# Supplementary material for: Bioinformatic Design of Dendritic Cell-Specific Synthetic Promoters
Source: PubMed Central journal article supplement (PMC9016764; doi:10.1021/acssynbio.2c00027), 2022-04-07
Supplement: sb2c00027_si_001.pdf [file sb2c00027_si_001.pdf]

## SUPPLEMENTARY INFORMATION

### Bioinformatic Design of Dendritic Cell-Specific Synthetic Promoters

Abayomi O. Johnson<sup>1,2</sup>, Susan B. Fowler<sup>3</sup>, Carl I. Webster<sup>4</sup>, Adam J. Brown<sup>1,2,\*</sup>, David C. James<sup>1,2,\*</sup>

<sup>1</sup>Department of Chemical and Biological Engineering, University of Sheffield, Mappin St., Sheffield, S1 3JD, United Kingdom

<sup>2</sup>SynGenSys Limited, Freeths LLP, Norfolk Street, Sheffield, S1 2JE, United Kingdom

<sup>3</sup>Antibody Discovery and Protein Engineering, R&D, AstraZeneca, Cambridge, CB21 6GH, United Kingdom

<sup>4</sup>Discovery Sciences, R&D, AstraZeneca, Cambridge, CB21 6GH, United Kingdom

\*Address correspondence to:

**Professor David C. James:**

Email, [d.c.james@sheffield.ac.uk](mailto:d.c.james@sheffield.ac.uk)

Tel: +441142227594

Or

**Dr. Adam J. Brown:**

Email, [adam.brown@sheffield.ac.uk](mailto:adam.brown@sheffield.ac.uk)

Tel: +441142227505

**Table S1:** Highly expressed genes in monocyte-derived dendritic cells; **Table S2:** Highly expressed genes in conventional dendritic cells; **Table S3:** Tissue cell type specificity settings on GeneVestigator V3; **Table S4:** Genes exhibiting high transcriptional activity and specificity in monocyte-derived dendritic cells and conventional dendritic cells; **Table S5:** Genes upregulated during activation/maturation of dendritic cells; **Table S6:** Categorisation of relevant dendritic cell genes; **Table S7:** Tissue specificity and detailed matrix description filter settings on MatInspector for APC specific TFREs; **Table S8:** Tissue specificity and detailed matrix description filter settings on MatInspector for non-APC specific TFREs; **Table S9:** Off-target cells types of off-target tissues for informatics and *in vitro* assay; **Figure S1:** Analysis of candidate dendritic cell-specific transcriptional factor response elements (TFREs) and transcriptional factors in monocyte-derived and myeloid dendritic cells; **Figure S2:** Identification of dendritic cell-specific transcriptional factors; **Figure S3:** Plasmid map of pVAX1-CMV-GFP; **Figure S4:** GFP fluorescence intensities of all homotypic promoters and the hCMV-IE1 reference promoter (CMV) in DC 2.4, C2C12, NIH-3T3 and HUVEC cells; **Table S10:** TFRE composition and copy number of a first library of 42 synthetic promoters; **Figure S5:** GFP fluorescence intensities of all 42 first library promoters and the hCMV-IE1 reference promoter (CMV) in (A) DC 2.4, (B) C2C12 and NIH-3T3, (C) Caco-2 and (D) HUVEC cells; **Figure S6:** Specificity of dendritic cell-specific transcriptional activity across all 42 first library promoters visualised as the minimum fold change between the relative promoter activity in DC2.4 and the relative promoter activity across all off-target cells. 11 promoters exhibiting over 5-fold changes (marked by dotted line) are identified as dendritic cell-specific promoters; **Figure S7:** The dendritic cell-specific TFRE activity (DCSTA) score of all 12 TFREs arranged in descending order of magnitude; **Table S11:** TFRE composition, copy number of a second library of 16 dendritic cell-specific synthetic promoters; **Figure S8:** GFP fluorescence intensities of all 16 second library promoters and the hCMV-IE1 reference promoter (CMV) in DC 2.4, C2C12, NIH-3T3 and HUVEC cells; **Figure S9:** A simple linear regression of dendritic cell specific promoter activity score and the observed relative promoter activities of all 27 dendritic cell-specific promoters showing a strong positive relationship between both variables.

## Supplementary Tables

**Table S1: A1** – Genes highly expressed in monocyte-derived dendritic cells (moDC), ArrayExpress database at EMBL-EBI ([www.ebi.ac.uk/arrayexpress/experiments/E-MTAB-6192](http://www.ebi.ac.uk/arrayexpress/experiments/E-MTAB-6192)).

| <b>Gene</b>     | <b>Mean mRNA level</b> | <b>STD</b>  |
|-----------------|------------------------|-------------|
| <b>SNORD13</b>  | 12.82909385            | 0.019833554 |
| <b>FTL</b>      | 12.81008256            | 0.030539457 |
| <b>HLA-DRA</b>  | 12.71935515            | 0.022687207 |
| <b>CCL22</b>    | 12.64226067            | 0.05310759  |
| <b>TYROBP</b>   | 12.538833              | 0.031129798 |
| <b>FTH1P8</b>   | 12.5216531             | 0.070062705 |
| <b>RAB7A</b>    | 12.33515827            | 0.016670746 |
| <b>GRN</b>      | 12.29561328            | 0.026035347 |
| <b>MALAT1</b>   | 12.22171597            | 0.038826023 |
| <b>LYZ</b>      | 12.18757319            | 0.033674948 |
| <b>PSAP</b>     | 12.16688414            | 0.002611445 |
| <b>LAPTM5</b>   | 12.07567422            | 0.032336161 |
| <b>SLC25A6</b>  | 11.99567117            | 0.026516769 |
| <b>SRGN</b>     | 11.94129852            | 0.050420388 |
| <b>TMSB10</b>   | 11.93426646            | 0.082738587 |
| <b>A2M</b>      | 11.89327457            | 0.00888872  |
| <b>ANXA2P2</b>  | 11.87314745            | 0.074617681 |
| <b>OAZ1</b>     | 11.83120541            | 0.021382434 |
| <b>TXN</b>      | 11.82877427            | 0.019515204 |
| <b>ATP6V0C</b>  | 11.80895541            | 0.055630383 |
| <b>MRC1</b>     | 11.79075018            | 0.086431474 |
| <b>PLA2G7</b>   | 11.78402235            | 0.061951269 |
| <b>SPP1</b>     | 11.70435942            | 0.066146666 |
| <b>ATP6V0E1</b> | 11.65368214            | 0.008684307 |
| <b>ITGAX</b>    | 11.61468957            | 0.038858546 |
| <b>FTH1P7</b>   | 11.56785087            | 0.046545406 |
| <b>YBX1</b>     | 11.54218633            | 0.004389826 |
| <b>PLXDC2</b>   | 11.49943535            | 0.042659063 |
| <b>CSTB</b>     | 11.46819527            | 0.058868029 |
| <b>HLA-B</b>    | 11.46657791            | 0.014442646 |
| <b>CALR</b>     | 11.45100415            | 0.046847303 |
| <b>ANPEP</b>    | 11.43859743            | 0.053405334 |
| <b>RF01210</b>  | 11.43452348            | 0.081118907 |
| <b>GM2A</b>     | 11.42517079            | 0.046897114 |
| <b>FPR3</b>     | 11.41178038            | 0.0536685   |
| <b>ALOX15</b>   | 11.39910845            | 0.04031236  |
| <b>CD1A</b>     | 11.38504379            | 0.031473336 |

|                   |             |             |
|-------------------|-------------|-------------|
| <b>GLIPR1</b>     | 11.35768803 | 0.053854828 |
| <b>CAPNS1</b>     | 11.35647621 | 0.050903268 |
| <b>LCPI</b>       | 11.34066594 | 0.053985991 |
| <b>PPT1</b>       | 11.30519777 | 0.047041434 |
| <b>HIST2H2AC</b>  | 11.29740247 | 0.039179784 |
| <b>ATP6V1B2</b>   | 11.2846137  | 0.02416734  |
| <b>IGSF6</b>      | 11.26713139 | 0.014139913 |
| <b>TUBB</b>       | 11.25563173 | 0.046659269 |
| <b>SLC7A11</b>    | 11.24953265 | 0.088179485 |
| <b>CTSS</b>       | 11.20418681 | 0.060699726 |
| <b>EEF2</b>       | 11.19994701 | 0.031060926 |
| <b>CTSC</b>       | 11.18802129 | 0.106105711 |
| <b>CSDE1</b>      | 11.17487798 | 0.004084117 |
| <b>PRDX1</b>      | 11.16326323 | 0.024411849 |
| <b>IQGAP1</b>     | 11.15854157 | 0.05037886  |
| <b>PEA15</b>      | 11.15684002 | 0.061749477 |
| <b>PARP4</b>      | 11.15539767 | 0.051879959 |
| <b>CD74</b>       | 11.15536821 | 0.037297678 |
| <b>ATP5F1B</b>    | 11.15371615 | 0.027546463 |
| <b>MOB3A</b>      | 11.13417093 | 0.126391782 |
| <b>AC092573.1</b> | 11.11716193 | 0.033915874 |
| <b>CST7</b>       | 11.10573724 | 0.145211491 |
| <b>SAMHD1</b>     | 11.04819144 | 0.05727806  |
| <b>HLA-DMB</b>    | 11.04459135 | 0.048702836 |
| <b>HMOX1</b>      | 11.04298858 | 0.121070979 |
| <b>NCF2</b>       | 10.99800199 | 0.035083902 |
| <b>GPNMB</b>      | 10.9781378  | 0.052138523 |
| <b>GPR183</b>     | 10.97190986 | 0.134262421 |
| <b>ARL6IP5</b>    | 10.96683019 | 0.047351652 |
| <b>RAB31</b>      | 10.95549893 | 0.078305513 |
| <b>FABP4</b>      | 10.94988614 | 0.108421396 |
| <b>CTSZ</b>       | 10.94683943 | 0.057501033 |
| <b>CSF1R</b>      | 10.94017429 | 0.049116318 |
| <b>DAD1</b>       | 10.93555656 | 0.075826779 |
| <b>GMFG</b>       | 10.93311728 | 0.017811189 |
| <b>FGL2</b>       | 10.9284917  | 0.050015122 |
| <b>ASAP1</b>      | 10.92624379 | 0.041823118 |
| <b>HSPA8</b>      | 10.92559414 | 0.066567253 |
| <b>RHOA</b>       | 10.92491618 | 0.062192056 |
| <b>PKM</b>        | 10.89754187 | 0.003455852 |
| <b>RPS15</b>      | 10.8941833  | 0.028181445 |
| <b>UBA52</b>      | 10.89254416 | 0.068400081 |

|                   |             |             |
|-------------------|-------------|-------------|
| <b>CAP1</b>       | 10.87504025 | 0.040000286 |
| <b>RPL4</b>       | 10.86158421 | 0.056148352 |
| <b>HEXB</b>       | 10.85920535 | 0.070526851 |
| <b>AC018738.1</b> | 10.85772775 | 0.055465758 |
| <b>CYP1B1</b>     | 10.85136126 | 0.048733784 |
| <b>CD53</b>       | 10.83999796 | 0.035308423 |
| <b>ITM2B</b>      | 10.83479686 | 0.054787878 |
| <b>ACTG1</b>      | 10.82385507 | 0.009522531 |
| <b>ACTN4</b>      | 10.81868858 | 0.03222306  |
| <b>FCER1G</b>     | 10.81461242 | 0.067663483 |
| <b>ACTR2</b>      | 10.7957423  | 0.058883459 |
| <b>GPX4</b>       | 10.79299059 | 0.103733047 |
| <b>ATP6AP1</b>    | 10.79243902 | 0.063185304 |
| <b>CD1B</b>       | 10.78872106 | 0.109914564 |
| <b>CXCL16</b>     | 10.76588835 | 0.07233349  |
| <b>PFN1</b>       | 10.762334   | 0.034771034 |
| <b>LITAF</b>      | 10.719734   | 0.078048179 |
| <b>PLEK</b>       | 10.71668552 | 0.124052856 |
| <b>SLC3A2</b>     | 10.71057889 | 0.05017224  |
| <b>PTBP1</b>      | 10.69695775 | 0.018226285 |
| <b>GNS</b>        | 10.69245304 | 0.025389602 |
| <b>MFS12</b>      | 10.59092363 | 0.167872234 |

**Table S2:** B1 – highly expressed genes in conventional dendritic cells (cDC).<sup>1</sup>

| <b>Gene</b>     | <b>Mean TPM</b> | <b>STD</b>  |
|-----------------|-----------------|-------------|
| <b>MT-RNR2</b>  | 42966.774       | 14420.97035 |
| <b>ACTB</b>     | 23602.422       | 2268.143758 |
| <b>FTH1</b>     | 22312.567       | 2849.869842 |
| <b>FTL</b>      | 17256.463       | 3322.378054 |
| <b>CD74</b>     | 13926.964       | 5060.07214  |
| <b>TMSB4X</b>   | 12839.941       | 1174.97525  |
| <b>EEF1A1</b>   | 11998.758       | 1418.413392 |
| <b>B2M</b>      | 9970.056        | 1841.150728 |
| <b>OAZ1</b>     | 8892.439        | 4711.765554 |
| <b>MT-CO2</b>   | 7822.693        | 1851.798165 |
| <b>MT-CO1</b>   | 7242.711        | 964.5692788 |
| <b>MT-ND1</b>   | 6676.426        | 1313.841627 |
| <b>MALAT1</b>   | 5891.448        | 1642.452342 |
| <b>COTL1</b>    | 5858.83         | 1526.976099 |
| <b>HLA-DRA</b>  | 5045.631        | 1997.947524 |
| <b>MT-ND4L</b>  | 4504.026        | 1048.344304 |
| <b>RPL10</b>    | 4494.921        | 525.6296917 |
| <b>PSAP</b>     | 4491.943        | 825.5429734 |
| <b>TPT1</b>     | 4359.985        | 1093.530409 |
| <b>IFI30</b>    | 3966.538        | 1334.489197 |
| <b>CST3</b>     | 3486.39         | 914.834628  |
| <b>HLA-B</b>    | 3434.084        | 1045.551338 |
| <b>RPL8</b>     | 3408.282        | 819.0088507 |
| <b>RPS19</b>    | 3398.998        | 884.0476649 |
| <b>RPL13</b>    | 3356.337        | 362.5989013 |
| <b>HLA-DPA1</b> | 3283.981        | 855.2909276 |
| <b>EEF1A1P5</b> | 3265.927        | 1053.001141 |
| <b>MT-ND2</b>   | 3209.876        | 314.1323442 |
| <b>RPS27</b>    | 3115.577        | 242.3899326 |
| <b>PABPC1</b>   | 3076.857        | 385.7277945 |
| <b>RPL41</b>    | 3054.854        | 113.3969374 |
| <b>DUSP1</b>    | 2897.001        | 1242.553889 |
| <b>TMSB10</b>   | 2890.841        | 856.8382726 |
| <b>MT-TS1</b>   | 2874.058        | 950.7887692 |
| <b>MT-CYB</b>   | 2857.191        | 315.3013425 |
| <b>LYZ</b>      | 2837.866        | 1915.668424 |
| <b>FCGR3A</b>   | 2805.037        | 1380.026972 |
| <b>MT-ND3</b>   | 2729.896        | 1692.883829 |
| <b>ACTG1</b>    | 2710.907        | 351.17409   |
| <b>RPL19</b>    | 2680.893        | 280.9368966 |

|                 |          |             |
|-----------------|----------|-------------|
| <b>RPL28</b>    | 2676.312 | 241.9280207 |
| <b>UBC</b>      | 2604.189 | 1007.280844 |
| <b>MT-RNR1</b>  | 2536.331 | 1090.527872 |
| <b>RPL26</b>    | 2525.474 | 223.2530034 |
| <b>CTSS</b>     | 2463.753 | 571.948714  |
| <b>TYROBP</b>   | 2418.549 | 489.7737061 |
| <b>VIM</b>      | 2375.781 | 422.0928965 |
| <b>RPS18</b>    | 2311.133 | 628.5886066 |
| <b>HLA-C</b>    | 2304.075 | 683.1588141 |
| <b>SAT1</b>     | 2302.362 | 332.0210485 |
| <b>MT-ND5</b>   | 2299.851 | 388.1322022 |
| <b>RPS11</b>    | 2230.471 | 559.3492156 |
| <b>RPL4</b>     | 2228.519 | 362.3731121 |
| <b>MT-ND4</b>   | 2189.995 | 598.8416652 |
| <b>ALDOA</b>    | 2178.22  | 514.4990156 |
| <b>RPL18A</b>   | 2156.834 | 260.3224751 |
| <b>PFN1</b>     | 2040.761 | 521.8521144 |
| <b>NAPSB</b>    | 1989.478 | 1460.647847 |
| <b>RPL3</b>     | 1985.305 | 333.2907581 |
| <b>RPS16</b>    | 1972.806 | 483.7850603 |
| <b>GAPDH</b>    | 1967.819 | 276.7296197 |
| <b>RPS23</b>    | 1963.033 | 688.145049  |
| <b>RPL13A</b>   | 1957.101 | 292.974744  |
| <b>MT-CO3</b>   | 1941.779 | 488.0359058 |
| <b>CFL1</b>     | 1937.166 | 331.4724289 |
| <b>ITM2B</b>    | 1932.745 | 463.7466549 |
| <b>FCER1G</b>   | 1853.647 | 490.5215902 |
| <b>RPS6</b>     | 1839.882 | 341.7982697 |
| <b>GNB2L1</b>   | 1772.021 | 260.0601655 |
| <b>SERPINA1</b> | 1731.143 | 412.223002  |
| <b>RPLP1</b>    | 1715.837 | 363.6256727 |
| <b>RPL15</b>    | 1662.473 | 160.9303156 |
| <b>RPL31</b>    | 1644.151 | 427.5831962 |
| <b>SH3BGRL3</b> | 1634.711 | 247.9604116 |
| <b>RPS12</b>    | 1628.5   | 219.0760056 |
| <b>RPLP2</b>    | 1619.835 | 236.8882772 |
| <b>RPS3A</b>    | 1619.324 | 322.7096218 |
| <b>RPS8</b>     | 1615.35  | 220.8630282 |
| <b>RPS24</b>    | 1578.088 | 532.8809178 |
| <b>RPL27A</b>   | 1531.635 | 273.5495961 |
| <b>HLA-DPB1</b> | 1526.252 | 722.2324508 |
| <b>RPL11</b>    | 1517.189 | 102.5195622 |

|                 |          |             |
|-----------------|----------|-------------|
| <b>PTMA</b>     | 1516.975 | 327.782518  |
| <b>RPS15</b>    | 1499.445 | 306.4764055 |
| <b>RPL37A</b>   | 1480     | 225.0701887 |
| <b>RPL17</b>    | 1467.666 | 216.3186594 |
| <b>IFITM2</b>   | 1462.532 | 391.6872604 |
| <b>NACA</b>     | 1419.749 | 116.303063  |
| <b>MT-ATP6</b>  | 1414.479 | 351.4040304 |
| <b>S100A11</b>  | 1414.434 | 138.4340323 |
| <b>RPS3</b>     | 1381.354 | 216.7214932 |
| <b>H3F3B</b>    | 1349.338 | 396.7425552 |
| <b>LAPTM5</b>   | 1324.891 | 315.5564936 |
| <b>RPS4X</b>    | 1323.043 | 149.0322362 |
| <b>RPL12</b>    | 1287.614 | 248.7468478 |
| <b>RPS28</b>    | 1279.531 | 97.33175146 |
| <b>RPL5</b>     | 1261.458 | 144.9402203 |
| <b>CORO1A</b>   | 1249.319 | 243.250832  |
| <b>RPL23A</b>   | 1242.916 | 214.4746579 |
| <b>ARHGDIB</b>  | 1238.502 | 109.5347158 |
| <b>EIF1</b>     | 1233.582 | 213.5154021 |
| <b>RPL29</b>    | 1225.004 | 166.2150607 |
| <b>LSP1</b>     | 1209.741 | 347.3706244 |
| <b>JUNB</b>     | 1204.877 | 386.4596521 |
| <b>RPS13</b>    | 1194.023 | 204.0626675 |
| <b>NFKBIA</b>   | 1178.972 | 919.2822053 |
| <b>NAP1L1</b>   | 1165.918 | 396.034932  |
| <b>C10orf54</b> | 1162.204 | 546.2711433 |
| <b>S100A4</b>   | 1148.42  | 323.8930379 |
| <b>RPL7A</b>    | 1138.249 | 186.4163829 |
| <b>FOS</b>      | 1135.474 | 288.8276293 |
| <b>CD52</b>     | 1124.742 | 302.481606  |
| <b>RPS17</b>    | 1124.579 | 59.80189163 |
| <b>RPS29</b>    | 1112.521 | 305.4494239 |
| <b>ARPC2</b>    | 1106.482 | 194.3824432 |
| <b>H3F3AP4</b>  | 1092.558 | 142.6616449 |
| <b>MYL6</b>     | 1056.885 | 179.2535253 |
| <b>TXNIP</b>    | 1052.215 | 305.9298604 |
| <b>ITGB2</b>    | 1050.728 | 281.5828448 |
| <b>HLA-A</b>    | 1046.889 | 214.517029  |
| <b>S100A10</b>  | 1034.736 | 164.5005644 |
| <b>RPL30</b>    | 1032.97  | 191.6999853 |
| <b>RPS20</b>    | 1023.131 | 76.3241403  |
| <b>RPL32</b>    | 1009.913 | 113.6199672 |



|                 |          |             |
|-----------------|----------|-------------|
| <b>RPL6</b>     | 1002.258 | 142.8519671 |
| <b>EEF1G</b>    | 1001.328 | 84.77240158 |
| <b>IFITM3</b>   | 995.563  | 591.6842787 |
| <b>MT-ND6</b>   | 985.477  | 263.7080231 |
| <b>YWHAZ</b>    | 970.697  | 298.7662475 |
| <b>RPS14</b>    | 969.982  | 271.2514027 |
| <b>UBA52</b>    | 968.321  | 185.2041913 |
| <b>RPL23</b>    | 961.831  | 162.5918191 |
| <b>RPS27A</b>   | 946.594  | 241.4911798 |
| <b>RPL10A</b>   | 943.564  | 97.4258306  |
| <b>RPS5</b>     | 911.814  | 137.748256  |
| <b>HLA-E</b>    | 907.995  | 139.6551852 |
| <b>RHOA</b>     | 902.827  | 197.538106  |
| <b>RPS9</b>     | 900.699  | 189.4488818 |
| <b>TSC22D3</b>  | 894.199  | 355.4597041 |
| <b>RPL36A</b>   | 875.566  | 69.9132334  |
| <b>ARPC1B</b>   | 872.763  | 178.1156057 |
| <b>RPLP0</b>    | 866.41   | 186.1399269 |
| <b>S100A6</b>   | 862.948  | 87.16276144 |
| <b>RPL18</b>    | 854.224  | 80.74826286 |
| <b>DDX5</b>     | 853.912  | 53.99353718 |
| <b>RNASEK</b>   | 846.536  | 290.9586126 |
| <b>RPL18AP3</b> | 846.132  | 110.3611378 |
| <b>PTPN6</b>    | 845.021  | 106.5266758 |
| <b>RPL7</b>     | 842.577  | 186.4640208 |
| <b>LST1</b>     | 840.022  | 174.2094246 |
| <b>MT-ATP8</b>  | 838.662  | 131.5829353 |
| <b>RPL41P5</b>  | 821.7465 | 441.2177727 |
| <b>TPM3</b>     | 812.482  | 102.3043759 |
| <b>ANXA2</b>    | 812.139  | 77.39971894 |
| <b>RPL38</b>    | 798.632  | 168.1615573 |
| <b>HLA-DRB1</b> | 793.915  | 285.2917051 |
| <b>ARPC3</b>    | 787.143  | 72.02070376 |
| <b>RPL39</b>    | 786.506  | 236.4056909 |
| <b>RPL9P9</b>   | 785.681  | 299.0953032 |
| <b>RPS28P7</b>  | 781.408  | 162.5513959 |
| <b>FAU</b>      | 771.415  | 116.8237796 |
| <b>PGK1</b>     | 762.725  | 60.11768791 |
| <b>RPL35</b>    | 759.586  | 101.4698555 |
| <b>RPL34</b>    | 756.805  | 166.5449588 |
| <b>FKBP1A</b>   | 753.772  | 135.1011024 |
| <b>SLC25A6</b>  | 746.975  | 94.94690562 |

|                  |          |             |
|------------------|----------|-------------|
| <b>WARS</b>      | 744.133  | 159.8199595 |
| <b>MT-TY</b>     | 743.2775 | 800.044356  |
| <b>RPS15A</b>    | 736.849  | 95.51933609 |
| <b>EEF1B2</b>    | 730.996  | 68.88509576 |
| <b>RPL14</b>     | 729.013  | 129.0851509 |
| <b>RPS25</b>     | 728.099  | 240.1494377 |
| <b>H3F3A</b>     | 726.656  | 118.7908356 |
| <b>CALM2</b>     | 717.621  | 161.181487  |
| <b>RPL36</b>     | 698.486  | 82.06505646 |
| <b>FTLP3</b>     | 697.05   | 103.6036848 |
| <b>RAB11A</b>    | 690.772  | 496.2841145 |
| <b>TKT</b>       | 686.14   | 125.9283902 |
| <b>CALM1</b>     | 681.81   | 98.33185394 |
| <b>GRN</b>       | 679.764  | 177.9184477 |
| <b>RPL37</b>     | 677.851  | 147.5866886 |
| <b>RPS10</b>     | 671.389  | 40.07567208 |
| <b>HNRNPA1</b>   | 662.514  | 115.9671781 |
| <b>LCP1</b>      | 659.12   | 107.7616474 |
| <b>AIF1</b>      | 658.334  | 156.0027193 |
| <b>TUBA1B</b>    | 645.963  | 72.00037106 |
| <b>GABARAP</b>   | 641.414  | 167.0134009 |
| <b>UCP2</b>      | 640.251  | 140.7431129 |
| <b>RAC2</b>      | 638.816  | 91.34319039 |
| <b>TCIRG1</b>    | 632.557  | 198.1804249 |
| <b>FCN1</b>      | 632.433  | 184.4935677 |
| <b>PTMAP5</b>    | 626.776  | 583.7713374 |
| <b>KLF6</b>      | 625.78   | 143.5839453 |
| <b>ZFP36</b>     | 615.548  | 261.3214994 |
| <b>SARAF</b>     | 615.04   | 151.2988339 |
| <b>FGR</b>       | 613.805  | 140.3512444 |
| <b>RPSA</b>      | 597.677  | 162.6314997 |
| <b>RPL27</b>     | 596.794  | 105.5388368 |
| <b>PPIA</b>      | 587.543  | 117.0939219 |
| <b>UBB</b>       | 581.639  | 29.33642071 |
| <b>SELPLG</b>    | 578.137  | 140.0763572 |
| <b>NFKBIZ</b>    | 573.314  | 371.1932812 |
| <b>CD37</b>      | 558.597  | 104.6241773 |
| <b>LINC01272</b> | 552.137  | 65.00657348 |
| <b>LILRB2</b>    | 544.394  | 105.7245779 |
| <b>COX4I1</b>    | 542.649  | 132.8564255 |
| <b>PFDN5</b>     | 534.845  | 120.7706051 |
| <b>EIF4A1</b>    | 534.734  | 143.3953175 |

|                 |         |             |
|-----------------|---------|-------------|
| <b>GSTK1</b>    | 534.546 | 288.6918469 |
| <b>PLAC8</b>    | 532.769 | 363.0268478 |
| <b>CSF1R</b>    | 523.616 | 198.5509512 |
| <b>PRELID1</b>  | 523.101 | 126.4001887 |
| <b>SYNGR2</b>   | 521.989 | 62.54570883 |
| <b>PTPRC</b>    | 521.344 | 87.9197016  |
| <b>ACTR3</b>    | 508.286 | 148.692854  |
| <b>EEF1D</b>    | 501.968 | 129.8200873 |
| <b>HCK</b>      | 500.046 | 61.10773636 |
| <b>HLA-DQB1</b> | 499.456 | 434.007286  |
| <b>DAZAP2</b>   | 499.259 | 58.83250265 |
| <b>RHOG</b>     | 483.404 | 106.8651462 |
| <b>ATP5B</b>    | 482.594 | 34.12003946 |
| <b>RPS2</b>     | 479.249 | 118.5444676 |
| <b>TAGLN2</b>   | 477.225 | 148.8387927 |
| <b>FXYD5</b>    | 475.876 | 63.72703129 |
| <b>RPL9</b>     | 469.161 | 128.0937107 |
| <b>CD68</b>     | 466.833 | 119.4811942 |
| <b>EMP3</b>     | 463.214 | 184.5850876 |
| <b>CAP1</b>     | 461.548 | 39.72004541 |
| <b>CFD</b>      | 461.191 | 213.8682186 |
| <b>HMGN2</b>    | 457.769 | 24.18084376 |
| <b>RPS21</b>    | 451.567 | 43.08443594 |
| <b>SRGN</b>     | 448.28  | 167.7409811 |
| <b>LRRC25</b>   | 447.002 | 96.04187736 |
| <b>FLNA</b>     | 446.386 | 153.8714904 |
| <b>CFP</b>      | 445.869 | 38.78773298 |
| <b>STXBP2</b>   | 443.39  | 164.6625883 |
| <b>FTH1P7</b>   | 438.356 | 90.18284554 |
| <b>TSPO</b>     | 437.186 | 52.29109178 |
| <b>HNRNPK</b>   | 434.761 | 104.0166374 |
| <b>RPL41P1</b>  | 428.709 | 377.6223588 |
| <b>EEF2</b>     | 418.112 | 49.11842992 |
| <b>TPI1</b>     | 418.092 | 75.90407636 |
| <b>LGALS1</b>   | 416.813 | 178.563663  |
| <b>SERF2</b>    | 416.752 | 113.8818348 |
| <b>CRIP1</b>    | 415.005 | 120.8967234 |
| <b>HSPA8</b>    | 410.919 | 158.2102742 |
| <b>RPS7</b>     | 408.006 | 87.23245521 |
| <b>BTF3</b>     | 405.886 | 45.00052589 |
| <b>ENO1</b>     | 401.115 | 71.18225104 |
| <b>TUBA1A</b>   | 399.995 | 53.91499351 |

|                 |         |             |
|-----------------|---------|-------------|
| <b>SLC25A3</b>  | 399.738 | 63.82276598 |
| <b>PECAM1</b>   | 395.844 | 158.2210938 |
| <b>TIMP1</b>    | 394.45  | 200.3888347 |
| <b>MS4A7</b>    | 392.724 | 98.09335843 |
| <b>CDC37</b>    | 387.8   | 187.2846465 |
| <b>YWHAB</b>    | 383.839 | 47.5748742  |
| <b>PSME1</b>    | 383.576 | 65.80713652 |
| <b>EIF3L</b>    | 376.906 | 116.2921104 |
| <b>EEF1A1P6</b> | 374.766 | 87.17357652 |
| <b>RNH1</b>     | 372.957 | 30.84741796 |
| <b>TNFRSF1B</b> | 372.325 | 113.6697142 |
| <b>S100A9</b>   | 370.817 | 249.8898452 |
| <b>MTND2P28</b> | 369.15  | 108.0809397 |
| <b>RNASET2</b>  | 365.613 | 82.43609924 |
| <b>RPL13AP5</b> | 364.93  | 91.79719515 |
| <b>RPL3P4</b>   | 360.173 | 345.8144113 |
| <b>RPL35A</b>   | 359.274 | 117.8652023 |
| <b>RPL21</b>    | 357.689 | 64.28564949 |
| <b>MYD88</b>    | 356.41  | 40.75486336 |
| <b>ANXA5</b>    | 354.614 | 50.88584201 |
| <b>MIR3064</b>  | 352.805 | 410.4843965 |
| <b>LILRA1</b>   | 351.764 | 77.53233796 |
| <b>CD44</b>     | 349.701 | 53.64455289 |
| <b>UQCRC1</b>   | 345.322 | 63.90300322 |
| <b>GMFG</b>     | 343.255 | 209.6021637 |
| <b>GSTP1</b>    | 340.212 | 76.0784713  |
| <b>ADGRE5</b>   | 339.165 | 39.22627579 |
| <b>HCLS1</b>    | 337.611 | 57.17858585 |
| <b>ASAH1</b>    | 336.629 | 69.36020314 |
| <b>SRSF5</b>    | 334.098 | 61.6364059  |
| <b>CNBP</b>     | 332.278 | 35.11398628 |
| <b>RHOC</b>     | 331.783 | 56.57244102 |
| <b>MYL12A</b>   | 326.111 | 86.56905483 |
| <b>MSN</b>      | 326.036 | 77.13287491 |
| <b>CLIC1</b>    | 325.363 | 73.46900559 |
| <b>CTSH</b>     | 321.403 | 102.6468551 |
| <b>ARF1</b>     | 318.352 | 52.98826316 |
| <b>CTSB</b>     | 318.019 | 52.78118964 |
| <b>NPC2</b>     | 317.263 | 80.68432868 |
| <b>RGS19</b>    | 312.725 | 78.69306299 |
| <b>MT-TQ</b>    | 306.963 | 636.5700552 |
| <b>CCNI</b>     | 300.48  | 108.5921367 |

|                 |         |             |
|-----------------|---------|-------------|
| <b>RPL24</b>    | 295.087 | 104.8358908 |
| <b>PYCARD</b>   | 292.803 | 47.78565234 |
| <b>MT-TN</b>    | 291.007 | 155.4957792 |
| <b>CD48</b>     | 290.036 | 55.88341675 |
| <b>TMBIM6</b>   | 288.69  | 61.35639952 |
| <b>CTSD</b>     | 285.362 | 104.128723  |
| <b>CPVL</b>     | 284.087 | 129.68021   |
| <b>SIGLEC10</b> | 282.607 | 101.8507773 |
| <b>CD53</b>     | 281.285 | 77.61424966 |
| <b>LIMD2</b>    | 277.98  | 79.70791115 |
| <b>SLC25A5</b>  | 272.158 | 54.80868392 |
| <b>ATP5G2</b>   | 272.019 | 73.2911407  |
| <b>PGAM1</b>    | 270.935 | 22.76309486 |
| <b>EIF3F</b>    | 268.597 | 46.01024894 |
| <b>PTP4A2</b>   | 267.324 | 57.81571104 |
| <b>GDI2</b>     | 265.049 | 64.69550317 |
| <b>CCND3</b>    | 261.134 | 79.32295344 |
| <b>BID</b>      | 260.933 | 31.67813769 |
| <b>PILRA</b>    | 260.582 | 26.70503525 |
| <b>MYL12B</b>   | 257.382 | 15.34261329 |
| <b>SPN</b>      | 256.609 | 33.67900448 |
| <b>ZFP36L1</b>  | 256.409 | 135.1624944 |
| <b>PPP1CA</b>   | 254.65  | 13.2836756  |
| <b>ATP6V0B</b>  | 253.126 | 23.01402871 |
| <b>HLA-DQA1</b> | 250.483 | 122.9385742 |
| <b>SLC11A1</b>  | 248.485 | 65.07453294 |
| <b>MYO1F</b>    | 247.207 | 60.34528757 |
| <b>M6PR</b>     | 245.988 | 51.51361356 |
| <b>NME2</b>     | 245.784 | 22.88393634 |
| <b>CAPZB</b>    | 245.305 | 20.48321325 |
| <b>ARPC5</b>    | 244.365 | 60.84653061 |
| <b>HLA-F</b>    | 242.502 | 141.1998471 |
| <b>LDHA</b>     | 242.316 | 44.77327264 |
| <b>HLA-DRB5</b> | 240.386 | 182.494776  |
| <b>EIF5A</b>    | 240.231 | 42.63392478 |
| <b>C1orf162</b> | 237.759 | 36.4618188  |
| <b>ANXA1</b>    | 237.203 | 93.36220124 |
| <b>EIF3K</b>    | 236.913 | 52.59056683 |
| <b>GPX4</b>     | 235.382 | 27.89436068 |
| <b>MT-TL1</b>   | 232.734 | 152.4164751 |
| <b>LILRB1</b>   | 232.662 | 67.81292932 |
| <b>LILRA5</b>   | 231.535 | 84.35525658 |

|                 |          |             |
|-----------------|----------|-------------|
| <b>COX7C</b>    | 229.809  | 57.08853085 |
| <b>PRR13</b>    | 229.577  | 40.61869068 |
| <b>CTSC</b>     | 229.539  | 51.20306478 |
| <b>PTMAP2</b>   | 228.379  | 83.78501159 |
| <b>LY6E</b>     | 226.575  | 93.74953    |
| <b>CMTM6</b>    | 226.129  | 35.72681038 |
| <b>ATP5A1</b>   | 226.128  | 67.28538601 |
| <b>AP1S2</b>    | 225.289  | 61.95950607 |
| <b>CNN2</b>     | 224.757  | 43.19310747 |
| <b>ATP5L</b>    | 224.755  | 58.27021774 |
| <b>ZFAND5</b>   | 223.177  | 64.22947256 |
| <b>RBM3</b>     | 220.725  | 42.33726063 |
| <b>LGALS9</b>   | 217.434  | 76.71170131 |
| <b>RNF130</b>   | 214.986  | 22.58902593 |
| <b>RPS3AP6</b>  | 214.627  | 88.40512362 |
| <b>MT-TK</b>    | 214.285  | 293.4270925 |
| <b>PTGES3</b>   | 213.152  | 18.03307572 |
| <b>THEMIS2</b>  | 213.035  | 51.41989875 |
| <b>GNG5</b>     | 212.86   | 47.00170529 |
| <b>ARPC4</b>    | 211.813  | 40.17305029 |
| <b>CANX</b>     | 210.54   | 110.5558746 |
| <b>IER2</b>     | 210.321  | 69.33293656 |
| <b>NPM1</b>     | 210.021  | 61.52320887 |
| <b>SLC44A2</b>  | 208.954  | 77.65790844 |
| <b>PPT1</b>     | 207.154  | 48.64952433 |
| <b>ID2</b>      | 206.266  | 32.60451146 |
| <b>MT-TE</b>    | 205.557  | 200.0159337 |
| <b>HNRNPDL</b>  | 205.209  | 38.58289945 |
| <b>FCGRT</b>    | 204.861  | 35.16592801 |
| <b>EIF3H</b>    | 204.307  | 38.3162982  |
| <b>ZYX</b>      | 202.838  | 61.723497   |
| <b>COX5A</b>    | 202.532  | 25.83490459 |
| <b>RAP1B</b>    | 202.223  | 44.72667543 |
| <b>IL16</b>     | 202.039  | 89.29424263 |
| <b>AMPD2</b>    | 199.901  | 76.58821012 |
| <b>CKB</b>      | 198.72   | 87.37614592 |
| <b>LAMTOR4</b>  | 197.929  | 43.94854796 |
| <b>LGALS3</b>   | 195.918  | 26.91009165 |
| <b>ATG3</b>     | 195.773  | 43.29726227 |
| <b>PPP1R15A</b> | 194.7075 | 82.73655586 |
| <b>NINJ1</b>    | 194.687  | 68.89701042 |
| <b>MTATP6P1</b> | 194.296  | 66.26750999 |

|                  |         |             |
|------------------|---------|-------------|
| <b>ATP1B3</b>    | 193.132 | 11.41380338 |
| <b>TALDO1</b>    | 192.716 | 28.85840311 |
| <b>FCGR3B</b>    | 191.628 | 282.081323  |
| <b>ITGA4</b>     | 191.303 | 53.97940922 |
| <b>LYPD2</b>     | 190.083 | 73.48505814 |
| <b>PSMB8</b>     | 189.751 | 39.44031478 |
| <b>PKM</b>       | 189.082 | 40.01716516 |
| <b>HMOX1</b>     | 188.489 | 38.23212318 |
| <b>HK3</b>       | 187.794 | 19.59063022 |
| <b>FAM26F</b>    | 186.825 | 101.5140354 |
| <b>CD4</b>       | 186.756 | 25.51471791 |
| <b>PPIAP22</b>   | 186.394 | 65.33823167 |
| <b>FLII</b>      | 186.336 | 36.60852981 |
| <b>ITGAX</b>     | 185.884 | 37.2570192  |
| <b>LRRFIP1</b>   | 185.389 | 45.52638293 |
| <b>GLIPR1</b>    | 183.732 | 28.31202077 |
| <b>SHKBP1</b>    | 183.566 | 33.15337566 |
| <b>TPP1</b>      | 183.307 | 42.34351081 |
| <b>BIN2</b>      | 182.147 | 32.46568893 |
| <b>GPX1</b>      | 181.902 | 63.5262592  |
| <b>SLC7A7</b>    | 181.867 | 36.96713838 |
| <b>PGLS</b>      | 181.61  | 38.89497365 |
| <b>HNRNPA2B1</b> | 178.462 | 29.0941458  |
| <b>HLA-DMA</b>   | 178.214 | 88.53689664 |

**Table S3: Tissue cell type specificity settings on GeneVestigator V3 <sup>2</sup>**

| <b>Expressed in</b>                     | <b>Not expressed in</b>           |
|-----------------------------------------|-----------------------------------|
| <b>Monocyte derived dendritic cells</b> | Blood outgrowth endothelium       |
|                                         | Blood vessel vascular endothelium |
|                                         | Microvascular endothelium         |
|                                         | Lymphatic microvessel endothelium |
|                                         | Skin fibroblast                   |
|                                         | Dermal microvessel endothelium    |
|                                         | Epidermal keratinocyte            |
|                                         | Dermal fibroblast                 |
|                                         | Monocyte derived microphage       |
|                                         | Skeletal muscle myoblast          |
|                                         | Skeletal muscle myotube           |
|                                         | Myoblast derived myotube          |
|                                         | Synovial fibroblast               |
| <b>Conventional dendritic cells</b>     | Blood vessel vascular endothelium |
|                                         | Dermal microvessel endothelium    |
|                                         | Epidermal keratinocyte            |
|                                         | Dermal fibroblast                 |
|                                         | Monocyte derived microphage       |
|                                         | Skeletal muscle myoblast          |
|                                         | Skeletal muscle myotube           |
|                                         | Myoblast derived myotube          |
| Joint synovial fibroblast               |                                   |



**Table S4:** Genes exhibiting high transcriptional activity and specificity in monocyte-derived dendritic cells and conventional dendritic cells <sup>2</sup>

| <b>Cell type</b>                        | <b>Gene</b>                         |       |
|-----------------------------------------|-------------------------------------|-------|
| <b>Monocyte-derived dendritic cells</b> | CCL22                               |       |
|                                         | ALOX15                              |       |
|                                         | NCF2                                |       |
|                                         | CD1A                                |       |
|                                         | CD74                                |       |
|                                         | TYROBP                              |       |
|                                         | HLA-DRA                             |       |
|                                         | CD1B                                |       |
|                                         | LCP1                                |       |
|                                         | FPR3                                |       |
|                                         | MRC1                                |       |
|                                         | CSF1R                               |       |
|                                         | <b>Conventional dendritic cells</b> | CPVL  |
|                                         |                                     | ITGB2 |
| AMPD2                                   |                                     |       |
| COTL1                                   |                                     |       |
| VSIR                                    |                                     |       |
| CD48                                    |                                     |       |
| FGR                                     |                                     |       |
| STXBP2                                  |                                     |       |
| MYO1F                                   |                                     |       |
| THEMIS2                                 |                                     |       |
| HCLS1                                   |                                     |       |
| CD74                                    |                                     |       |
| SPN                                     |                                     |       |
| TNFRSF1B                                |                                     |       |
| FOS                                     |                                     |       |
| SELPLG                                  |                                     |       |
| SIGLEC10                                |                                     |       |
| PLAC8                                   |                                     |       |
| HK3                                     |                                     |       |
| TCIRG1                                  |                                     |       |
| LRRC25                                  |                                     |       |
| RNASET2                                 |                                     |       |
| C1orf162                                |                                     |       |
| CFP                                     |                                     |       |
| HLA-DRA                                 |                                     |       |
| FCN1                                    |                                     |       |
| RGS19                                   |                                     |       |
| PTPN6                                   |                                     |       |
| ADGRE5                                  |                                     |       |
| HLA-DPA1                                |                                     |       |
| ITGAX                                   |                                     |       |
| HLA-DMA                                 |                                     |       |
| HLA-DPB1                                |                                     |       |

**Table S5:** 72 C - Genes upregulated during activation/maturation of dendritic cells.<sup>3</sup>

| <b>Gene</b>     | <b>Ensembl ID</b>               | <b>Gene ID</b> |
|-----------------|---------------------------------|----------------|
| <b>AZI2</b>     | ENSG00000163512                 | 64343          |
| <b>B3GNT2</b>   | ENSG00000170340                 | 10678          |
| <b>CCDC50</b>   | ENSG00000152492                 | 152137         |
| <b>CCL2</b>     | ENSG00000108691                 | 6347           |
| <b>CCL4</b>     | ENSG00000129277                 | 6351           |
| <b>CD200</b>    | ENSG00000091972                 | 4345           |
| <b>CD38</b>     | ENSG00000004468                 | 952            |
| <b>CD80</b>     | ENSG00000121594                 | 941            |
| <b>CD86</b>     | ENSG00000114013                 | 942            |
| <b>CFB</b>      | ENSG00000243649                 | 629            |
| <b>CFLAR</b>    | ENSG00000003402                 | 8837           |
| <b>CLIC4</b>    | ENSG00000169504                 | 25932          |
| <b>CXCL10</b>   | ENSG00000169245                 | 3627           |
| <b>CXCL9</b>    | ENSG00000138755                 | 4283           |
| <b>DNAJA2</b>   | ENSG00000069345                 | 10294          |
| <b>DUSP2</b>    | ENSG00000158050                 | 1844           |
| <b>EIF2AK2</b>  | ENSG00000055332                 | 5610           |
| <b>FSCN1</b>    | <a href="#">ENSG00000075618</a> | 6624           |
| <b>GADD45B</b>  | ENSG00000099860                 | 4616           |
| <b>GBP2</b>     | ENSG00000162645                 | 2634           |
| <b>GCH1</b>     | ENSG00000131979                 | 2643           |
| <b>GPD2</b>     | ENSG00000115159                 | 2820           |
| <b>IFI44</b>    | ENSG00000137965                 | 10561          |
| <b>IFIH1</b>    | ENSG00000115267                 | 64135          |
| <b>IFIT2</b>    | ENSG00000119922                 | 3433           |
| <b>IFIT3</b>    | ENSG00000119917                 | 3437           |
| <b>IL15</b>     | ENSG00000164136                 | 3600           |
| <b>IL15RA</b>   | ENSG00000134470                 | 3601           |
| <b>IL2RA</b>    | ENSG00000134460                 | 3559           |
| <b>IL6</b>      | ENSG00000136244                 | 3569           |
| <b>IRF1</b>     | ENSG00000125347                 | 3659           |
| <b>ISG20</b>    | ENSG00000172183                 | 3669           |
| <b>JDP2</b>     | ENSG00000140044                 | 122953         |
| <b>LTA</b>      | ENSG00000226979                 | 4049           |
| <b>MARCKSL1</b> | ENSG00000175130                 | 65108          |
| <b>MX1</b>      | ENSG00000157601                 | 4599           |
| <b>NCK2</b>     | ENSG00000071051                 | 8440           |
| <b>NFKBIA</b>   | ENSG00000100906                 | 4792           |
| <b>NMI</b>      | ENSG00000123609                 | 9111           |
| <b>NT5C3</b>    | ENSG00000122643                 | 51251          |

|                 |                 |       |
|-----------------|-----------------|-------|
| <b>OAS2</b>     | ENSG00000111335 | 4939  |
| <b>OASL</b>     | ENSG00000135114 | 8638  |
| <b>PARP9</b>    | ENSG00000138496 | 83666 |
| <b>PELI1</b>    | ENSG00000197329 | 57162 |
| <b>PI4K2B</b>   | ENSG00000038210 | 55300 |
| <b>PLA1A</b>    | ENSG00000144837 | 51365 |
| <b>PML</b>      | ENSG00000140464 | 5371  |
| <b>PTGS2</b>    | ENSG00000073756 | 5743  |
| <b>RBBP8</b>    | ENSG00000101773 | 5932  |
| <b>REL</b>      | ENSG00000162924 | 5966  |
| <b>RGS1</b>     | ENSG00000090104 | 5996  |
| <b>RIPK2</b>    | ENSG00000104312 | 8767  |
| <b>RSAD2</b>    | ENSG00000134321 | 91543 |
| <b>RTP4</b>     | ENSG00000136514 | 64108 |
| <b>SDC4</b>     | ENSG00000124145 | 6385  |
| <b>SERPINB9</b> | ENSG00000170542 | 5272  |
| <b>SOS1</b>     | ENSG00000115904 | 6654  |
| <b>STAT1</b>    | ENSG00000115415 | 6772  |
| <b>STAT2</b>    | ENSG00000170581 | 6773  |
| <b>TANK</b>     | ENSG00000136560 | 10010 |
| <b>TAP1</b>     | ENSG00000168394 | 6890  |
| <b>TDRD7</b>    | ENSG00000196116 | 23424 |
| <b>TLK2</b>     | ENSG00000146872 | 11011 |
| <b>TMCC3</b>    | ENSG00000057704 | 57458 |
| <b>TNFAIP3</b>  | ENSG00000118503 | 7128  |
| <b>TNFSF10</b>  | ENSG00000121858 | 8743  |
| <b>TNFSF4</b>   | ENSG00000117586 | 7292  |
| <b>TNFSF9</b>   | ENSG00000125657 | 8744  |
| <b>TRAF1</b>    | ENSG00000056558 | 7185  |
| <b>TRIM21</b>   | ENSG00000132109 | 6737  |
| <b>UBE2L6</b>   | ENSG00000156587 | 9246  |
| <b>XRN1</b>     | ENSG00000114127 | 54464 |
| <b>ZNF281</b>   | ENSG00000162702 | 23528 |

**Table S6:** Categorisation of relevant dendritic cell genes

| Gene Class Nomenclature | Gene Type                           | Number of genes |
|-------------------------|-------------------------------------|-----------------|
| A1                      | Highly expressed in moDC            | 100             |
| A2                      | Highly specific to moDC             | 100             |
| A1-2                    | Highly expressed moDC-specific gene | 12              |
| B1                      | Highly expressed in cDC             | 400             |
| B2                      | Highly specific to cDC              | 400             |
| B1-2                    | Highly expressed cDC-specific gene  | 33              |
| C                       | Upregulated in moDC & cDC           | 64              |

**Table S7: Tissue specificity and detailed matrix description filter settings on MatInspector for APC specific TFREs**

| Contains                 | AND | Does not contain (ANY) |
|--------------------------|-----|------------------------|
| Antigen presenting cells |     | Skeletal muscles       |
|                          |     | Skeletal               |
|                          |     | Connective tissue      |
|                          |     | Repressor              |
|                          |     | Repressing             |
|                          |     | Suppressor             |

**Table S8: Tissue specificity and detailed matrix description filter settings on MatInspector for non-APC specific TFREs**

| Contains (ANY)    | OR | Does not contain (ANY)   |
|-------------------|----|--------------------------|
| Skeletal muscles  |    | Antigen presenting cells |
| Skeletal          |    | Leukocytes               |
| Connective tissue |    | PU.1                     |
| Repressor         |    |                          |
| Repressing        |    |                          |
| Suppressor        |    |                          |
| Ubiquitous        |    |                          |

**Table S9: Off-target cells types of off-target tissues for informatics and *in vitro* assay**

| Tissue                 | Cell types                         | Cell line for assay |
|------------------------|------------------------------------|---------------------|
| Skeletal muscle tissue | Skeletal muscle                    | C2C12               |
|                        | Skeletal muscle superior quadracep |                     |
| Connective tissue      | Differentiated myofibroblast       | NIH-3T3             |
|                        | Skin cultured fibroblast           |                     |
|                        | Skin fibroblast                    |                     |
| Endothelium            | Microvascular endothelial cell     | HUVEC               |
|                        | Lymphatic vessel endothelial cell  |                     |
| Epithelium             | Skin epithelial cell keratinocyte  | CaCO-2              |

**Figure S1.** Analysis of candidate dendritic cell-specific transcriptional factor response elements (TFREs) and transcriptional factors in monocyte-derived and myeloid dendritic cells (A) Identification of 745 transcriptional factor regulatory sequences (TFREs) over-represented in the promoter regions of target genes (highly expressed genes specific to the target cell types: monocyte derived dendritic cells (moDC), conventional/myeloid dendritic cells (cDC) and genes which are upregulated during dendritic cell activation/maturation), using the common TF tool of Genomatix,  $p$  value  $< 0.005$ . (B) Identification of 52 TFRES of transcriptional factors (TFs) unique to antigen presenting cells (APCs) in the promoter region of target genes, using the MatInspector tool of Genomatix. (C) Identification of 170 transcriptional factors highly expressed in the target cell types (moDC, cDC, and mature/activated myeloid/conventional dendritic cells (mmDC)). (D) Selection of 79 candidate TFs which are relatively highly expressed in the target cell types compared to the off-target cell types (myocytes, fibroblast, endothelial and epithelial cells).

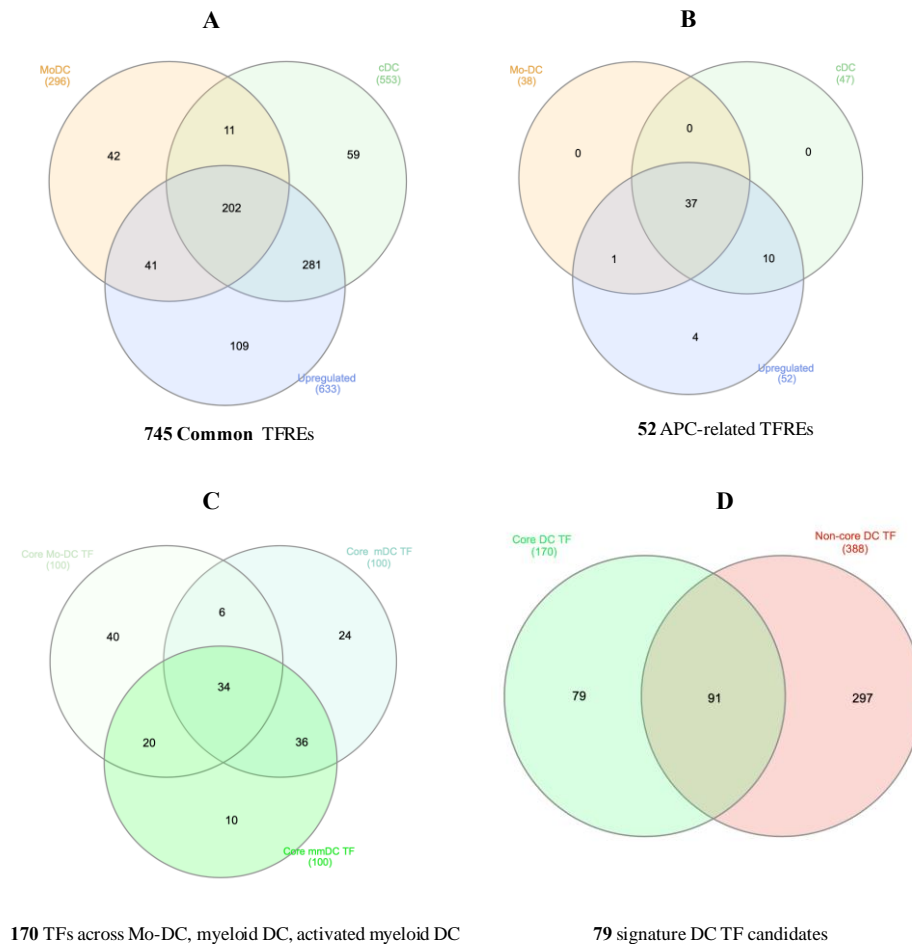

**Figure S2.** Identification of dendritic cell-specific transcriptional factors **(A)** Identification of 69 core transcriptional factors (TFs) with high regulatory potential in target cell types: monocyte-derived, conventional and activated dendritic cells (TSSQ cut-off > 0.1) using the Target Score Specificity Quotient (TSSQ) parameter *i.e.* the normalised difference of mean specificity score (1-100) of each of the 79 core TFs in the off-target and target cell types *i.e.* difference between the mean specificity score of each TF in all off-target cell types (MBSS) and the mean specificity score of each TF in all target cell types (MTSS) normalised the highest difference value. **(B)** Selection of 10 TFs with TSSQ > 0.1 and high regulatory potential in target cell types (using TFdiff encode (p value <0.05), Ingenuity Pathway Analysis, and the Human Protein Atlas) from a selection of transcriptional factor regulatory sequences (TFREs) which are common to a population of 745 over-represented TFREs in the promoters of target genes, 52 TFREs of TFs peculiar to antigen presenting cells (APCs), and all TFREs of the 69 core transcriptional factors found in the promoter region of target genes. **(C)** Classification of the 10 selected TFs based of TSSQ value **(D)** The mean of the mean specificity score of all 10 selected TFs in the off-target/base cell types and target cell types indicates that the selected TFs are unique to the target cell types (two-tailed independent t test, *p* value < 0.0001).

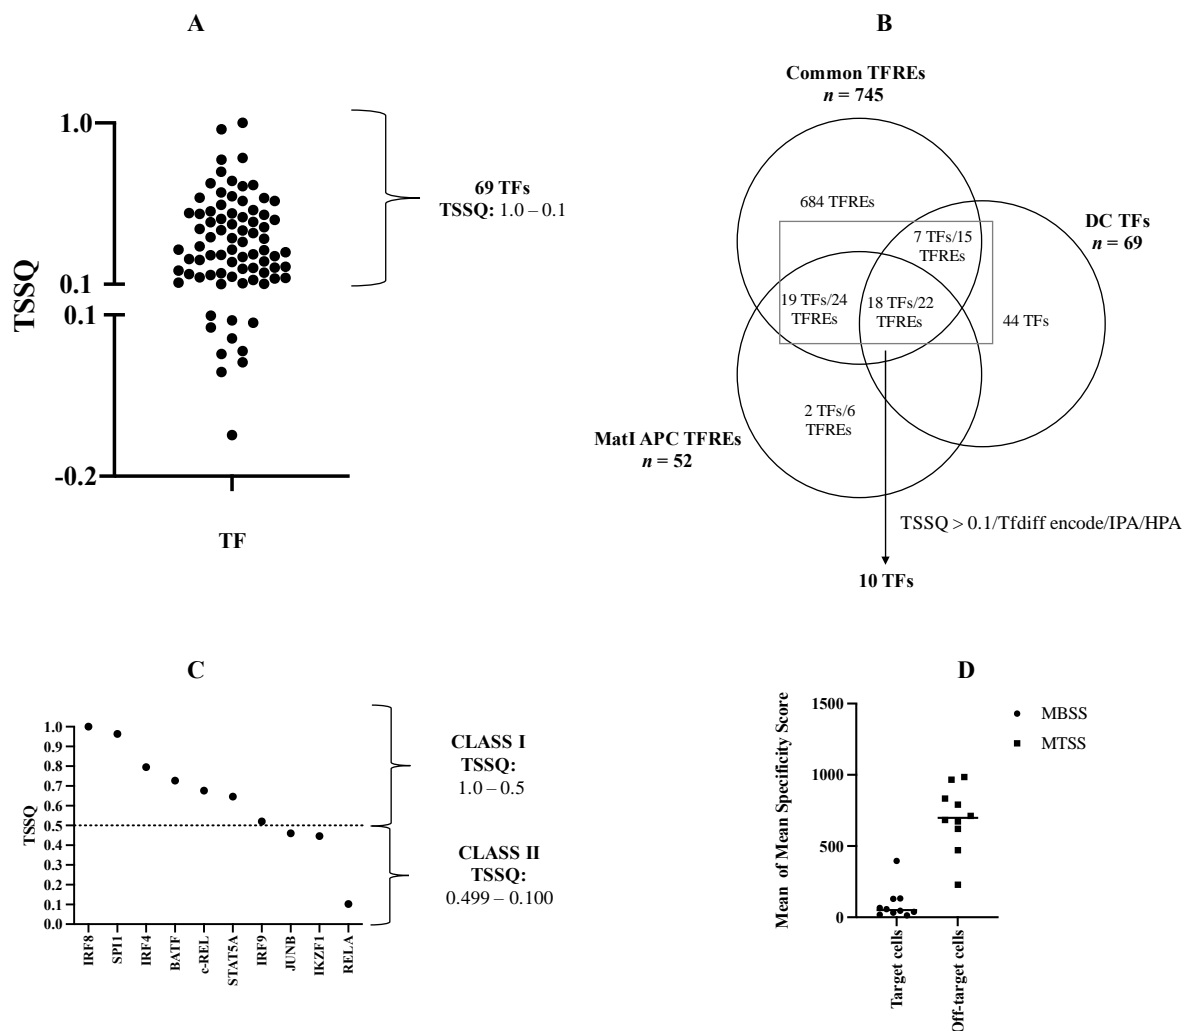

**Figure S3:** Plasmid map of pVAX1-CMV-GFP

Created with SnapGene®

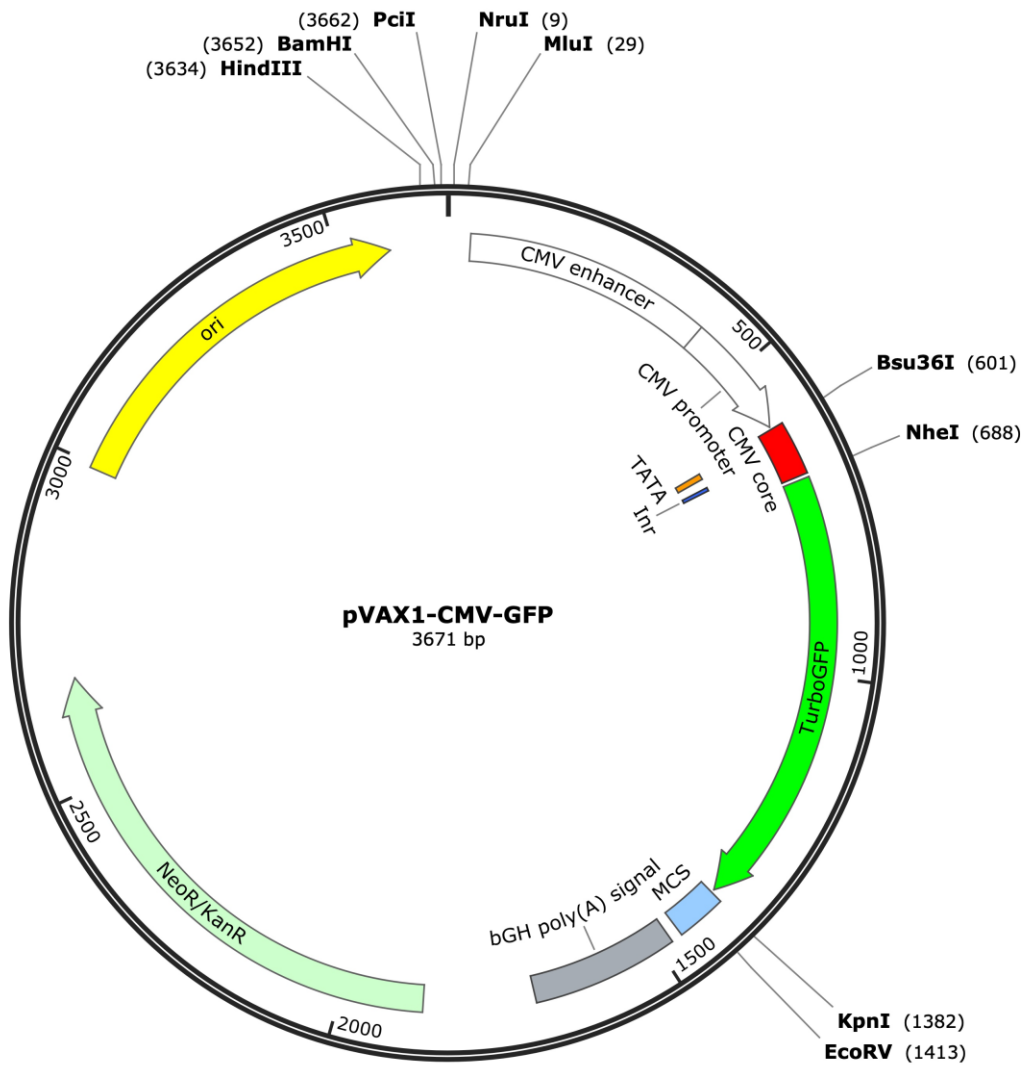

**Figure S4:** GFP fluorescence intensities of all homotypic promoters and the hCMV-IE1 reference promoter (CMV) in DC 2.4, C2C12, NIH-3T3 and HUVEC cells. Values represent the mean  $\pm$  standard deviation across three independent transfections each performed in triplicate.

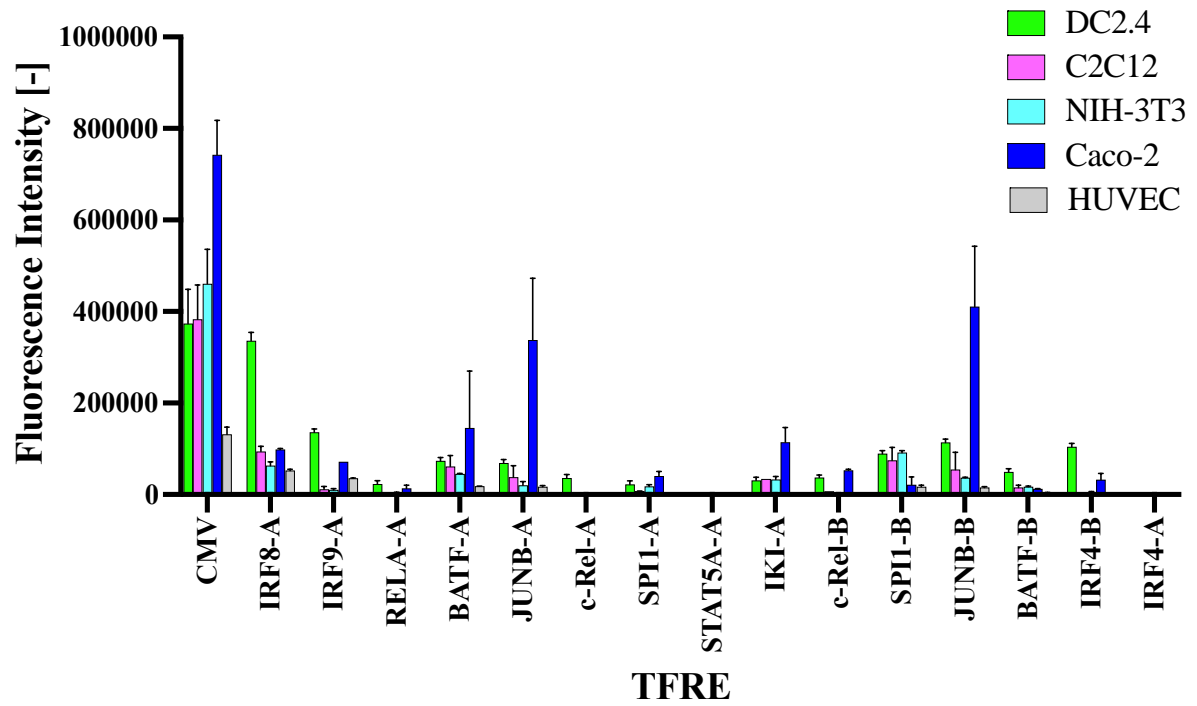



**Table S10.** TFRE composition and copy number of a first library of dendritic cell-specific synthetic promoter candidates

| PROMOTER | IRF8-A | IRF9-A | RELA-A | BATF-A | JUNB-A | c-Rel-A | SPI1-A | STAT5A-A | c-Rel-B | BATF-B | IRF4-B | IRF4-A |
|----------|--------|--------|--------|--------|--------|---------|--------|----------|---------|--------|--------|--------|
| 1/01     | 0      | 0      | 0      | 2      | 0      | 0       | 10     | 0        | 0       | 0      | 0      | 4      |
| 1/02     | 0      | 0      | 2      | 0      | 0      | 2       | 2      | 0        | 2       | 2      | 14     | 2      |
| 1/03     | 0      | 0      | 0      | 0      | 0      | 4       | 4      | 0        | 0       | 2      | 10     | 0      |
| 1/04     | 0      | 6      | 2      | 0      | 0      | 6       | 6      | 0        | 0       | 6      | 12     | 0      |
| 1/05     | 0      | 0      | 0      | 0      | 6      | 0       | 0      | 6        | 0       | 0      | 0      | 6      |
| 1/06     | 0      | 0      | 0      | 0      | 0      | 6       | 6      | 0        | 0       | 0      | 6      | 0      |
| 1/07     | 0      | 0      | 0      | 0      | 0      | 6       | 6      | 0        | 0       | 2      | 6      | 0      |
| 1/08     | 0      | 0      | 0      | 2      | 0      | 6       | 6      | 0        | 0       | 0      | 0      | 6      |
| 1/09     | 2      | 0      | 0      | 0      | 4      | 0       | 10     | 0        | 0       | 0      | 0      | 4      |
| 1/10     | 0      | 0      | 6      | 0      | 4      | 0       | 6      | 4        | 0       | 0      | 0      | 0      |
| 1/11     | 0      | 0      | 0      | 0      | 0      | 0       | 2      | 0        | 2       | 2      | 6      | 2      |
| 1/12     | 0      | 0      | 0      | 0      | 0      | 6       | 0      | 0        | 0       | 6      | 6      | 2      |
| 1/13     | 0      | 4      | 0      | 0      | 6      | 0       | 4      | 0        | 0       | 0      | 0      | 6      |
| 1/14     | 0      | 6      | 0      | 0      | 0      | 0       | 6      | 0        | 0       | 2      | 6      | 0      |
| 1/15     | 0      | 0      | 0      | 0      | 0      | 2       | 2      | 0        | 0       | 0      | 2      | 2      |
| 1/16     | 0      | 6      | 2      | 0      | 0      | 8       | 2      | 0        | 2       | 2      | 8      | 0      |
| 1/17     | 4      | 0      | 0      | 10     | 4      | 0       | 0      | 0        | 0       | 0      | 0      | 4      |
| 1/18     | 2      | 0      | 0      | 0      | 4      | 10      | 0      | 0        | 0       | 0      | 0      | 4      |
| 1/19     | 0      | 4      | 0      | 0      | 0      | 2       | 4      | 0        | 0       | 2      | 6      | 2      |
| 1/20     | 0      | 6      | 2      | 0      | 0      | 0       | 6      | 0        | 0       | 0      | 6      | 0      |
| 1/21     | 2      | 0      | 0      | 0      | 4      | 10      | 0      | 4        | 0       | 0      | 0      | 0      |
| 1/22     | 0      | 0      | 0      | 0      | 6      | 4       | 4      | 6        | 0       | 0      | 0      | 0      |
| 1/23     | 0      | 4      | 2      | 0      | 0      | 0       | 4      | 0        | 0       | 0      | 6      | 2      |
| 1/24     | 2      | 0      | 0      | 0      | 6      | 6       | 6      | 0        | 0       | 0      | 0      | 0      |
| 1/25     | 0      | 2      | 0      | 0      | 0      | 6       | 0      | 0        | 0       | 6      | 6      | 0      |

|             |    |    |   |   |   |   |   |   |   |   |   |   |
|-------------|----|----|---|---|---|---|---|---|---|---|---|---|
| <b>1/26</b> | 6  | 0  | 0 | 4 | 4 | 0 | 6 | 0 | 0 | 0 | 0 | 0 |
| <b>1/27</b> | 0  | 10 | 0 | 2 | 0 | 0 | 0 | 4 | 0 | 0 | 0 | 4 |
| <b>1/28</b> | 0  | 6  | 0 | 0 | 0 | 6 | 6 | 0 | 0 | 0 | 0 | 0 |
| <b>1/29</b> | 0  | 10 | 0 | 2 | 4 | 0 | 0 | 0 | 0 | 0 | 0 | 4 |
| <b>1/30</b> | 6  | 4  | 0 | 0 | 6 | 0 | 6 | 0 | 0 | 0 | 0 | 0 |
| <b>1/31</b> | 6  | 0  | 0 | 0 | 4 | 4 | 6 | 0 | 0 | 0 | 0 | 0 |
| <b>1/32</b> | 0  | 6  | 0 | 2 | 0 | 0 | 6 | 0 | 0 | 0 | 0 | 6 |
| <b>1/33</b> | 2  | 6  | 0 | 0 | 6 | 6 | 0 | 0 | 0 | 0 | 0 | 0 |
| <b>1/34</b> | 0  | 10 | 2 | 0 | 4 | 0 | 0 | 4 | 0 | 0 | 0 | 0 |
| <b>1/35</b> | 10 | 0  | 0 | 2 | 4 | 0 | 0 | 4 | 0 | 0 | 0 | 0 |
| <b>1/36</b> | 0  | 6  | 2 | 0 | 0 | 0 | 6 | 0 | 0 | 0 | 0 | 6 |
| <b>1/37</b> | 2  | 6  | 0 | 0 | 0 | 6 | 0 | 6 | 0 | 0 | 0 | 0 |
| <b>1/38</b> | 6  | 0  | 6 | 6 | 0 | 0 | 0 | 0 | 0 | 0 | 0 | 0 |
| <b>1/39</b> | 0  | 6  | 2 | 0 | 0 | 0 | 4 | 0 | 2 | 2 | 2 | 4 |
| <b>1/40</b> | 0  | 4  | 2 | 0 | 0 | 0 | 2 | 0 | 0 | 0 | 4 | 0 |
| <b>1/41</b> | 0  | 12 | 2 | 0 | 0 | 2 | 4 | 0 | 0 | 0 | 2 | 8 |
| <b>1/42</b> | 8  | 0  | 0 | 2 | 2 | 0 | 2 | 0 | 0 | 0 | 0 | 2 |

**Figure S5:** GFP fluorescence intensities of all 42 first library promoters and the hCMV-IE1 reference promoter (CMV) in (A) DC 2.4, (B) C2C12 and NIH-3T3, (C) Caco-2 and (D) HUVEC cells. Values represent the mean  $\pm$  standard deviation across three independent transfections each performed in triplicate.

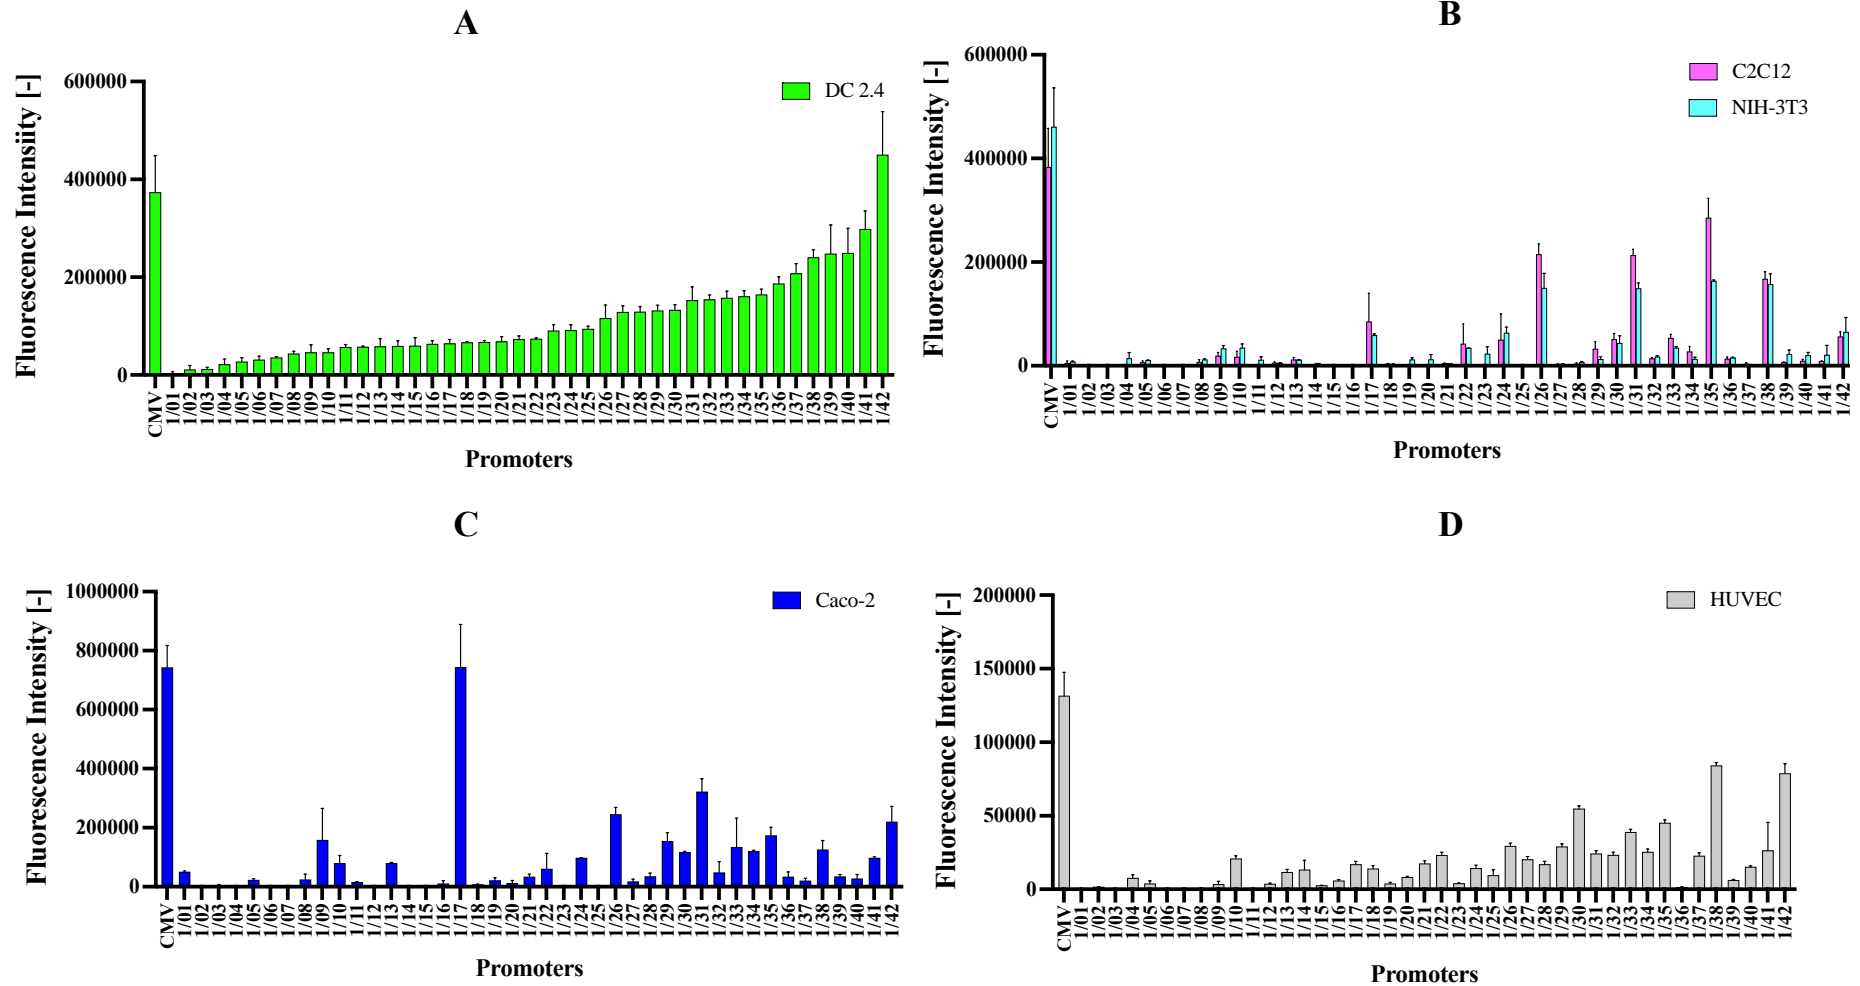

**Figure S6:** Specificity of dendritic cell-specific transcriptional activity across all 42 first library promoters visualised as the minimum fold change between the relative promoter activity in DC2.4 and the relative promoter activity across all off-target cells. 11 promoters (starred) exhibiting over 5-fold changes (marked by dotted line) are identified as dendritic cell-specific promoters.

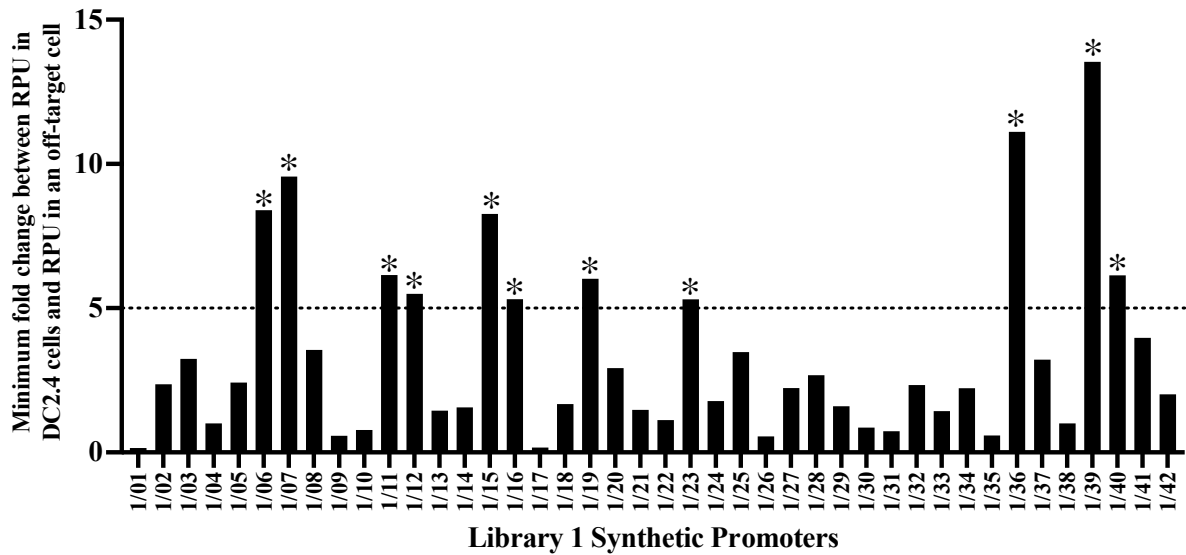

**Figure S7:** The dendritic cell-specific TFRE activity (DCSTA) score of all 12 TFREs arranged in descending order of magnitude.

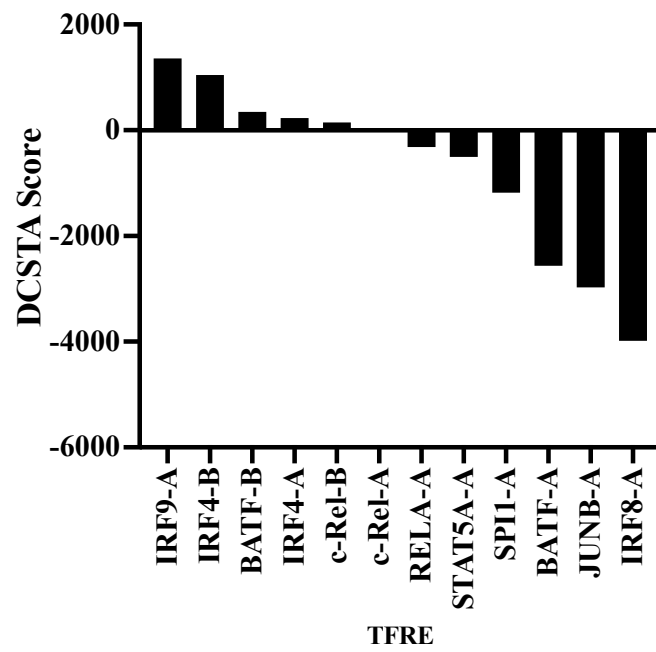

**Table S11.** TFRE composition, copy number of a second library of 16 dendritic cell-specific promoters.

| Promoter | IRF9-A | RELA-A | c-Rel-A | SPI1-A | c-Rel-B | BATF-B | IRF4-B | IRF4-A | BATF-A |
|----------|--------|--------|---------|--------|---------|--------|--------|--------|--------|
| 2/01     | 0      | 0      | 4       | 1      | 2       | 0      | 2      | 4      | 2      |
| 2/02     | 1      | 0      | 0       | 2      | 0       | 0      | 2      | 0      | 0      |
| 2/03     | 2      | 2      | 0       | 0      | 0       | 0      | 2      | 0      | 0      |
| 2/04     | 2      | 0      | 0       | 0      | 2       | 0      | 2      | 0      | 0      |
| 2/05     | 2      | 0      | 0       | 0      | 0       | 2      | 2      | 0      | 0      |
| 2/06     | 4      | 2      | 2       | 0      | 2       | 0      | 2      | 0      | 0      |
| 2/07     | 4      | 2      | 0       | 1      | 2       | 0      | 2      | 4      | 0      |
| 2/08     | 4      | 2      | 2       | 0      | 2       | 0      | 4      | 0      | 0      |
| 2/09     | 4      | 2      | 4       | 0      | 2       | 0      | 2      | 0      | 0      |
| 2/10     | 4      | 2      | 0       | 3      | 2       | 0      | 2      | 6      | 0      |
| 2/11     | 4      | 0      | 0       | 2      | 2       | 0      | 4      | 0      | 0      |
| 2/12     | 5      | 2      | 0       | 4      | 0       | 2      | 2      | 4      | 0      |
| 2/13     | 4      | 2      | 4       | 2      | 2       | 0      | 2      | 2      | 0      |
| 2/14     | 5      | 2      | 2       | 4      | 2       | 0      | 0      | 4      | 0      |
| 2/15     | 5      | 2      | 0       | 4      | 2       | 2      | 0      | 4      | 0      |
| 2/16     | 4      | 2      | 0       | 2      | 0       | 2      | 2      | 4      | 0      |

**Figure S8:** GFP fluorescence intensities of all 16 second library promoters and the hCMV-IE1 reference promoter (CMV) in DC 2.4, C2C12, NIH-3T3 and HUVEC cells. Values represent the mean  $\pm$  standard deviation across three independent transfections each performed in triplicate.

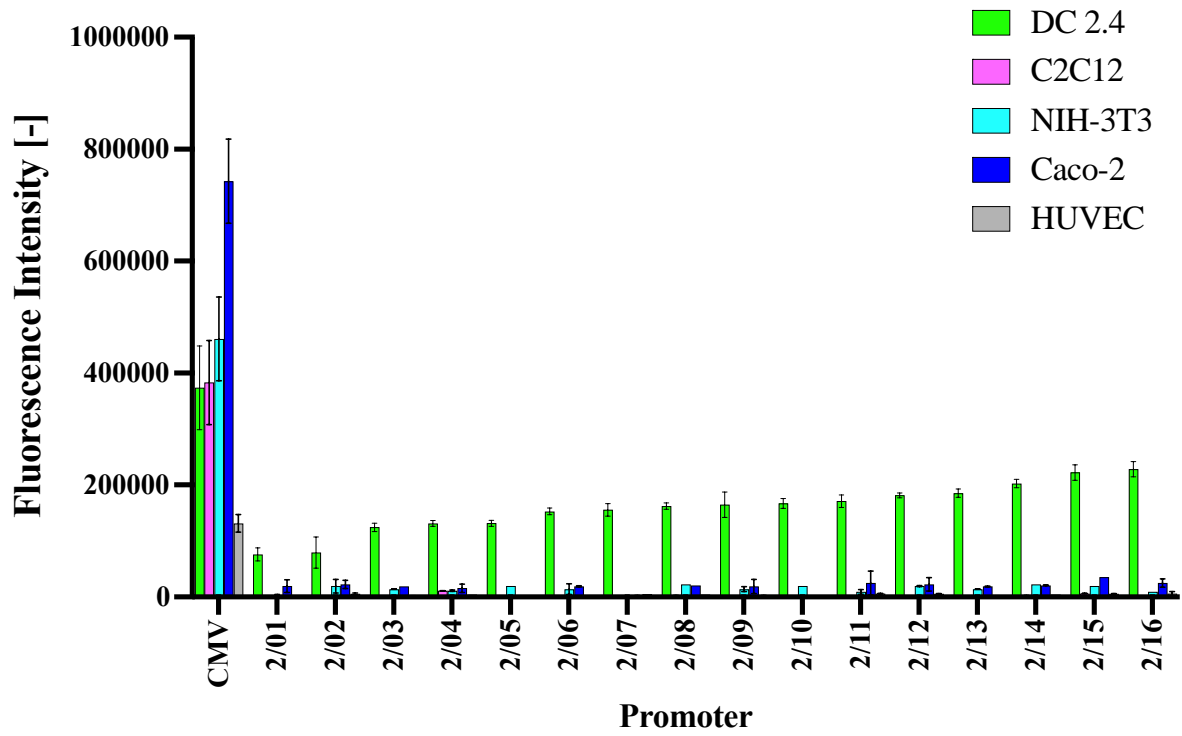

**Figure S9.** A simple linear regression of dendritic cell specific promoter activity score and the observed relative promoter activities of all 27 dendritic cell-specific promoters showing a strong positive relationship between both variables.

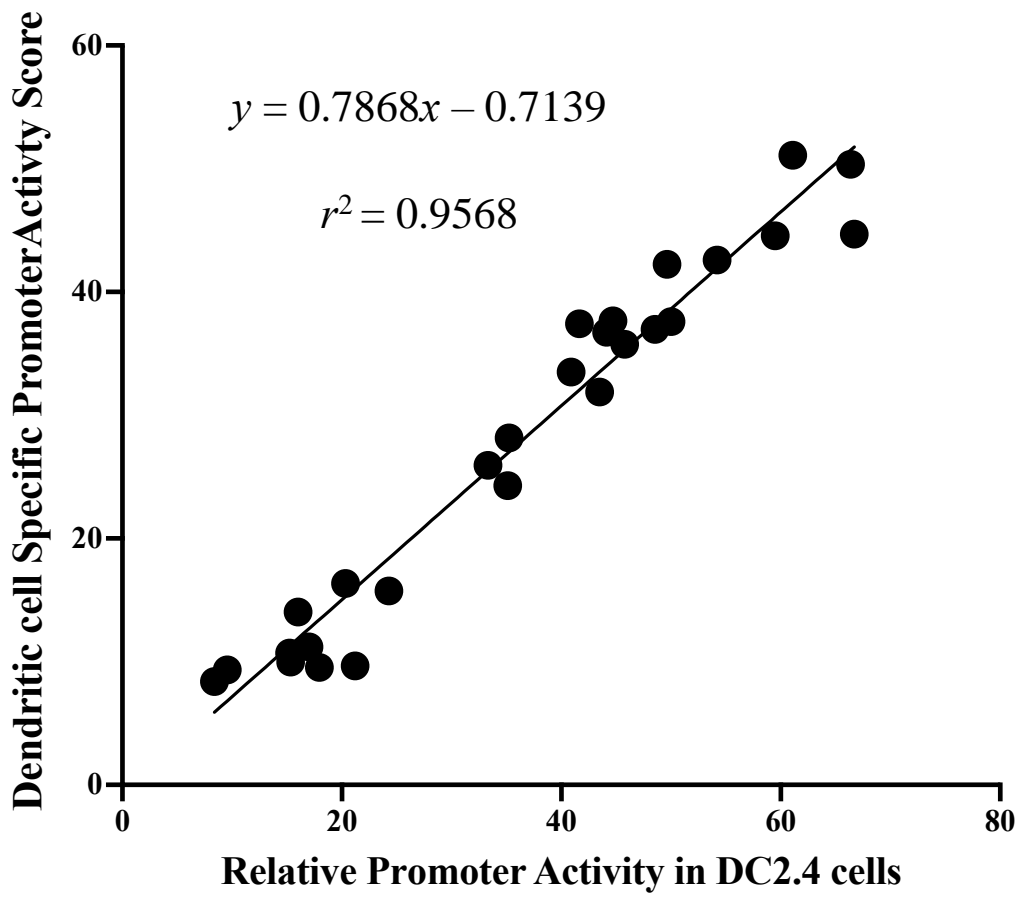



## DC-SPECIFIC PROMOTER SEQUENCES

### Colour code

| <b>TFRE</b>    | <b>Colour</b>      |
|----------------|--------------------|
| <b>IRF9-A</b>  | <b>Orange</b>      |
| <b>IRF4-B</b>  | <b>Blue</b>        |
| <b>IRF4-A</b>  | <b>Gold</b>        |
| <b>SPII-A</b>  | <b>Purple</b>      |
| <b>BATF-B</b>  | <b>Blue-Grey</b>   |
| <b>c-Rel-A</b> | <b>Grey</b>        |
| <b>c-Rel-B</b> | <b>Light-Green</b> |
| <b>RELA-A</b>  | <b>Red</b>         |
| <b>BATF-A</b>  | <b>Light-Blue</b>  |
| <b>SPACERS</b> | <b>Black</b>       |

FIRST LIBRARY

---

1. 1/36 - 471 bp

CTAAACCGAGAATCGAAACTAAGCTCTAAACCGAGAATCGAAACTAAGCTATAGGAGGGCTA  
AAGAAAGCAGAAAACCTATAGGAGGGCTAAAGAAAGCAGAACTAAACCGAGAATCGAAACTA  
AGCTCTAAACCGAGAATCGAAACTAAGCTGAAGGACTTTCCAGCGAAGGACTTTCCAGCATA  
GGAGGGCTAAAGAAAGCAGAAAACCTATAGGAGGGCTAAAGAAAGCAGAAAGTGAAGGAGGAA  
GTCTGAGGCTTGTGAAGGAGGAAGTCTGAGGCCTAAACCGAGAATCGAAACTAAGCTCTAAA  
CCGAGAATCGAAACTAAGCTGTGAAGGAGGAAGTCTGAGGCTTGTGAAGGAGGAAGTCTGAG  
GCATAGGAGGGCTAAAGAAAGCAGAAAACCTATAGGAGGGCTAAAGAAAGCAGAAAGTGAAGG  
AGGAAGTCTGAGGCTTGTGAAGGAGGAAGTCTGAGGC

---

2. 1/39 - 454 bp

CTAAACCGAGAATCGAAACTAAGCTCTAAACCGAGAATCGAAACTAAGCTATAGGAGGGCTA  
AAGAAAGCAGAAAACCTATAGGAGGGCTAAAGAAAGCAGAACTAAACCGAGAATCGAAACTA  
AGCTCTAAACCGAGAATCGAAACTAAGCTGAAGGACTTTCCAGCGAAGGACTTTCCAGCCAG  
GGTGGTTCCTTCCAGGGTGGTTCCTTCGTAGATGTGGAAGTGAAGCTACAAGTAGATGTGG  
AAGTGAAGCTACAACTAAACCGAGAATCGAAACTAAGCTCTAAACCGAGAATCGAAACTAA  
GCTGTGAAGGAGGAAGTCTGAGGCTTGTGAAGGAGGAAGTCTGAGGCATAGGAGGGCTAAAG  
AAAGCAGAAAACCTATAGGAGGGCTAAAGAAAGCAGAAAGTGAAGGAGGAAGTCTGAGGCTTG  
TGAAGGAGGAAGTCTGAGGC

---

3. 1/15 - 177 bp

CTTGGGGTTTCCAACCTTGGGGTTTCCAACGTAGATGTGGAAGTGAAGCTACAAGTAGATG  
TGGAAGTGAAGCTACAATAGGAGGGCTAAAGAAAGCAGAAAACCTATAGGAGGGCTAAAGA  
AAGCAGAAAGTGAAGGAGGAAGTCTGAGGCTTGTGAAGGAGGAAGTCTGAGGC

---

4. 1/40 - 274 bp

CTAAACCGAGAATCGAAACTAAGCTCTAAACCGAGAATCGAAACTAAGCTGTAGATGTGGAA  
GTGAAAGCTACAAGTAGATGTGGAAGTGAAGCTACAATAACCGAGAATCGAAACTAAGC  
TCTAAACCGAGAATCGAAACTAAGCTGAAGGACTTTCCAGCGAAGGACTTTCCAGCGTAGAT  
GTGGAAGTGAAGCTACAAGTAGATGTGGAAGTGAAGCTACAAGTGAAGGAGGAAGTCTGA  
GGCTTGTGAAGGAGGAAGTCTGAGGC

---

5. 1/06 - 374 bp

CTTGGGGTTTCCAACCTTGGGGTTTCCAACGTAGATGTGGAAGTGAAGCTACAAGTAGATG  
TGGAAGTGAAGCTACAAGTGAAGGAGGAAGTCTGAGGCTTGTGAAGGAGGAAGTCTGAGGC  
GTAGATGTGGAAGTGAAGCTACAAGTAGATGTGGAAGTGAAGCTACAAGTGAAGGAGGAA  
GTCTGAGGCTTGTGAAGGAGGAAGTCTGAGGCCTTGGGGTTTCCAACCTTGGGGTTTCCAAC  
GTAGATGTGGAAGTGAAGCTACAAGTAGATGTGGAAGTGAAGCTACAACCTTGGGGTTTCC  
AACCTTGGGGTTTCCAACAAGTGAAGGAGGAAGTCTGAGGCTTGTGAAGGAGGAAGTCTGAG  
GC

---

---

6. 1/16 - 600 bp

CTTGGGGTTTCCAACCTTGGGGTTTCCAACCTAAACCGAGAATCGAAACTAAGCTCTAAACC  
GAGAATCGAAACTAAGCTCAGGGTGGTTCTTCCAGGGTGGTTCTTCCCTAAACCGAGAATC  
GAAACTAAGCTCTAAACCGAGAATCGAAACTAAGCTCTTGGGGTTTCCAACCTTGGGGTTTC  
CAACGAAGGACTTTCCAGCGAAGGACTTTCCAGCGTAGATGTGGAAGTGAAAGCTACAAGTA  
GATGTGGAAGTGAAAGCTACAACCTTGGGGTTTCCAACCTTGGGGTTTCCAACCTTGGACTCA  
GTCTCTTGGACTCAGTCGTAGATGTGGAAGTGAAAGCTACAAGTAGATGTGGAAGTGAAAGCT  
ACAACCTAAACCGAGAATCGAAACTAAGCTCTAAACCGAGAATCGAAACTAAGCTGTAGATGT  
GGAAGTGAAAGCTACAAGTAGATGTGGAAGTGAAAGCTACAAGTGAAGGAGGAAGTCTGAGG  
CTTGTGAAGGAGGAAGTCTGAGGCCTTGGGGTTTCCAACCTTGGGGTTTCCAACCTGAGATGT  
GGAAGTGAAAGCTACAAGTAGATGTGGAAGTGAAAGCTACAAC

---

7. 1/07 - 400 bp

CTTGGGGTTTCCAACCTTGGGGTTTCCAACCTGAGATGTGGAAGTGAAAGCTACAAGTAGATG  
TGGAAGTGAAAGCTACAACCTTGGGGTTTCCAACCTTGGGGTTTCCAACCTTGGACTCAGTCT  
CTTGGACTCAGTCGTAGATGTGGAAGTGAAAGCTACAAGTAGATGTGGAAGTGAAAGCTACA  
GTGAAGGAGGAAGTCTGAGGCCTTGTGAAGGAGGAAGTCTGAGGCCTTGGGGTTTCCAACCTT  
GGGGTTTCCAACCTTGTGAAGGAGGAAGTCTGAGGCCTTGTGAAGGAGGAAGTCTGAGGCCTAG  
ATGTGGAAGTGAAAGCTACAAGTAGATGTGGAAGTGAAAGCTACAAGTGAAGGAGGAAGTCT  
GAGGCCTTGTGAAGGAGGAAGTCTGAGGC

---

8. 1/11 - 303 bp

GTAGATGTGGAAGTGAAAGCTACAAGTAGATGTGGAAGTGAAAGCTACAACAGGGTGGTTCC  
TTCCAGGGTGGTTCTTCCGTAGATGTGGAAGTGAAAGCTACAAGTAGATGTGGAAGTGAAAG  
CTACAATCTTGGACTCAGTCTCTTGGACTCAGTCGTAGATGTGGAAGTGAAAGCTACAAGTAGA  
TGTGGAAGTGAAAGCTACAACATAGGAGGGCTAAAGAAAGCAGAAAATATAGGAGGGCTAAA  
GAAAGCAGAAAGTGAAGGAGGAAGTCTGAGGCCTTGTGAAGGAGGAAGTCTGAGGC

---

9. 1/12 - 318 bp

CTTGGGGTTTCCAACCTTGGGGTTTCCAACCTGAGATGTGGAAGTGAAAGCTACAAGTAGATG  
TGGAAGTGAAAGCTACAATCTTGGACTCAGTCTCTTGGACTCAGTCCTTGGGGTTTCCAACCTT  
GGGGTTTCCAACCTTGGACTCAGTCTCTTGGACTCAGTCGTAGATGTGGAAGTGAAAGCTACA  
AGTAGATGTGGAAGTGAAAGCTACAATCTTGGACTCAGTCTCTTGGACTCAGTCCTTGGGGTTT  
CCAACCTTGGGGTTTCCAACCTGAGATGTGGAAGTGAAAGCTACAAGTAGATGTGGAAGTGAA  
AGCTACAAC

---

10. 1/23 - 451 bp

CTAAACCGAGAATCGAAACTAAGCTCTAAACCGAGAATCGAAACTAAGCTGTAGATGTGGAA  
GTGAAAGCTACAAGTAGATGTGGAAGTGAAAGCTACAACCTAAACCGAGAATCGAAACTAAGC  
TCTAAACCGAGAATCGAAACTAAGCTGAAGGACTTTCCAGCGAAGGACTTTCCAGCGTAGAT  
GTGGAAGTGAAAGCTACAAGTAGATGTGGAAGTGAAAGCTACAACCTTGGGGTTTCCAACCTT  
GGGGTTTCCAACCTGAGATGTGGAAGTGAAAGCTACAAGTAGATGTGGAAGTGAAAGCTACA  
GTGAAGGAGGAAGTCTGAGGCCTTGTGAAGGAGGAAGTCTGAGGCATAGGAGGGCTAAAGAAA  
GCAGAAAATATAGGAGGGCTAAAGAAAGCAGAAAGTGAAGGAGGAAGTCTGAGGCCTTGTGA  
AGGAGGAAGTCTGAGGC

---

11. 1/19 - 449 bp

CTAAACCGAGAATCGAAACTAAGCTCTAAACCGAGAATCGAAACTAAGCTGTAGATGTGGAA  
GTGAAAGCTACAAGTAGATGTGGAAGTCAAAGCTACAACCTAAACCGAGAATCGAAACTAAGC  
TCTAAACCGAGAATCGAAACTAAGCTACTCTTGACTCAGTCTCTTGACTCAGTCGTAGATGT  
GGAAGTCAAAGCTACAAGTAGATGTGGAAGTCAAAGCTACAACCTGGGGTTTCCAACCTGG  
GGTTTCCAACGTAGATGTGGAAGTCAAAGCTACAAGTAGATGTGGAAGTCAAAGCTACAAGT  
GAAGGAGGAAGTCTGAGGCTTGTGAAGGAGGAAGTCTGAGGCATAGGAGGGCTAAAGAAAGC  
AGAAAACCTATAGGAGGGCTAAAGAAAGCAGAAAGTGAAGGAGGAAGTCTGAGGCTTGTGAAG  
GAGGAAGTCTGAGGC

---

SECOND LIBRARY

---

12. 2/13 - 367 bp

CTTGGGGTTTCCAACCTTGGGGTTTCCAACCTAAACCGAGAATCGAAACTAAGCTCTAAACC  
GAGAATCGAAACTAAGCTCAGGGTGGTTCTTCCAGGGTGGTTCTTCTAAACCGAGAATC  
GAAACTAAGCTCTAAACCGAGAATCGAAACTAAGCTCTTGGGGTTTCCAACCTTGGGGTTTC  
CAACGAAGGACTTTCCAGCGAAGGACTTTCCAGCGTAGATGTGGAAGTGAAAGCTACAAGTA  
GATGTGGAAGTGAAAGCTACAAATAGGAGGGCTAAAGAAAGCAGAAAACCTATAGGAGGGCTA  
AAGAAAGCAGAAAGTGAAGGAGGAAGTCTGAGGCTTGTGAAGGAGGAAGTCTGAGGC

---

13. 2/01 - 295 bp

CTTGGGGTTTCCAACCTTGGGGTTTCCAACATAGGAGGGCTAAAGAAAGCAGAAAACCTATAG  
GAGGGCTAAAGAAAGCAGAAACTTGGGGTTTCCAACCTTGGGGTTTCCAACCTCCTGACTCAC  
TGTATCCTGACTCACTCATAGGAGGGCTAAAGAAAGCAGAAAACCTATAGGAGGGCTAAAGAA  
AGCAGAAAGTGAAGGAGGAAGTCTGAGGCCAGGGTGGTTCTTCCAGGGTGGTTCTTCTGTA  
GATGTGGAAGTGAAAGCTACAAGTAGATGTGGAAGTGAAAGCTACAA

---

14. 2/04 - 130 bp

CTAAACCGAGAATCGAAACTAAGCTCTAAACCGAGAATCGAAACTAAGCTCAGGGTGGTTCC  
TTCCAGGGTGGTTCTTCTGCTAGATGTGGAAGTGAAAGCTACAAGTAGATGTGGAAGTGAAAG  
CTACAA

---

15. 2/07 - 337 bp

CTAAACCGAGAATCGAAACTAAGCTCTAAACCGAGAATCGAAACTAAGCTATAGGAGGGCTA  
AAGAAAGCAGAAAACCTATAGGAGGGCTAAAGAAAGCAGAAACTAAACCGAGAATCGAAACTA  
AGCTCTAAACCGAGAATCGAAACTAAGCTGAAGGACTTTCCAGCGAAGGACTTTCCAGCATA  
GGAGGGCTAAAGAAAGCAGAAAACCTATAGGAGGGCTAAAGAAAGCAGAAAGTGAAGGAGGAA  
GTCTGAGGCCAGGGTGGTTCTTCCAGGGTGGTTCTTCTGCTAGATGTGGAAGTGAAAGCTAC  
AAGTAGATGTGGAAGTGAAAGCTACAA

---

16. 2/10 - 434 bp

CTAAACCGAGAATCGAAACTAAGCTCTAAACCGAGAATCGAAACTAAGCTATAGGAGGGCTA  
AAGAAAGCAGAAAACCTATAGGAGGGCTAAAGAAAGCAGAAACTAAACCGAGAATCGAAACTA  
AGCTCTAAACCGAGAATCGAAACTAAGCTGAAGGACTTTCCAGCGAAGGACTTTCCAGCATA  
GGAGGGCTAAAGAAAGCAGAAAACCTATAGGAGGGCTAAAGAAAGCAGAAAGTGAAGGAGGAA  
GTCTGAGGCCAGGGTGGTTCTTCCAGGGTGGTTCTTCTGCTAGATGTGGAAGTGAAAGCTAC  
AAGTAGATGTGGAAGTGAAAGCTACAAATAGGAGGGCTAAAGAAAGCAGAAAACCTATAGGAG  
GGCTAAAGAAAGCAGAAAGTGAAGGAGGAAGTCTGAGGCTTGTGAAGGAGGAAGTCTGAGGC

---

17. 2/16 - 356 bp

CTAAACCGAGAATCGAAACTAAGCTCTAAACCGAGAATCGAAACTAAGCTATAGGAGGGCTA  
AAGAAAGCAGAAAACCTATAGGAGGGCTAAAGAAAGCAGAAACTAAACCGAGAATCGAAACTA  
AGCTCTAAACCGAGAATCGAAACTAAGCTGAAGGACTTTCCAGCGAAGGACTTTCCAGCTCT  
TGACTCAGTCTCTTGACTCAGTCGTAGATGTGGAAGTGAAAGCTACAAGTAGATGTGGAAGT

GAAAGCTACAAATAGGAGGGCTAAAGAAAGCAGAAAACCTATAGGAGGGCTAAAGAAAGCAGA  
AAGTGAAGGAGGAAGTCTGAGGCTTGTGAAGGAGGAAGTCTGAGGC

---

18. 2/12 - 425 bp

ctaaaccgagaatcgaaactaagctctaaaccgagaatcgaaactaagcttataggagggcta  
aaGAAAgcagaaaACTataggaggggctaaaGAAAgcagaaaactaaaccgagaatcgaaacta  
agctctaaaccgagaatcgaaactaagctgaaggactttccAGCGAAGGACTTTCAGCtct  
tgactcagctctcttgactcagctcgtagatgtggaagtgaagctacaagtagatgtggaagt  
gaaagctacaaCTAAACCGAGAATCGAACTAAGctgtgaaggaggaagtctgaggcTTgtg  
aaggaggaagtctgaggcataggaggggctaaaGAAAgcagaaaACTataggaggggctaaaGA  
AAgcagaaaagtgaaggaggaagtctgaggcTTgtgaaggaggaagtctgaggc

---

19. 2/09 - 270 bp

CTTGGGGTTTCCAACCTTGGGGTTTCCAACCTAAACCGAGAATCGAACTAAGCTCTAAACC  
GAGAATCGAACTAAGCTCAGGGTGGTTCCCTTCAGGGTGGTTCCCTTCCTAAACCGAGAATC  
GAACTAAGCTCTAAACCGAGAATCGAACTAAGCTCTTGGGGTTTCCAACCTTGGGGTTTC  
CAACGAAGGACTTTCAGCGAAGGACTTTCAGCGTAGATGTGGAAGTGAAAGCTACAAGTA  
GATGTGGAAGTGAAAGCTACAA

---

20. 2/06 - 240 bp

CTAAACCGAGAATCGAACTAAGCTCTAAACCGAGAATCGAACTAAGCTCAGGGTGGTTCC  
TTCCAGGGTGGTTCCCTTCCTAAACCGAGAATCGAACTAAGCTCTAAACCGAGAATCGAAAC  
TAAGCTCTTGGGGTTTCCAACCTTGGGGTTTCCAACGAAGGACTTTCAGCGAAGGACTTTC  
CAGCGTAGATGTGGAAGTGAAAGCTACAAGTAGATGTGGAAGTGAAAGCTACAA

---

21. 2/05 - 126 bp

CTAAACCGAGAATCGAACTAAGCTCTAAACCGAGAATCGAACTAAGCTTCTTGACTCAGT  
CTCTTGACTCAGTCGTAGATGTGGAAGTGAAAGCTACAAGTAGATGTGGAAGTGAAAGCTAC  
AA

---

22. 2/02 - 119 bp

CTAAACCGAGAATCGAACTAAGCTGTGAAGGAGGAAGTCTGAGGCTTGTGAAGGAGGAAGT  
CTGAGGCGTAGATGTGGAAGTGAAAGCTACAAGTAGATGTGGAAGTGAAAGCTACAA

---

23. 2/03 - 130 bp

CTAAACCGAGAATCGAACTAAGCTCTAAACCGAGAATCGAACTAAGCTGAAGGACTTTC  
AGCGAAGGACTTTCAGCGTAGATGTGGAAGTGAAAGCTACAAGTAGATGTGGAAGTGAAAG  
CTACAA

---

24. 2/11 - 280 bp

CTAAACCGAGAATCGAACTAAGCTCTAAACCGAGAATCGAACTAAGCTGTGAAGGAGGAA  
GTCTGAGGCTTGTGAAGGAGGAAGTCTGAGGCGTAGATGTGGAAGTGAAAGCTACAAGTAGA  
TGTGGAAGTGAAAGCTACAACGCGTCTAAACCGAGAATCGAACTAAGCTCTAAACCGAGA

ATCGAAACTAAGCTCAGGGTGGTTCCTTCCAGGGTGGTTCCTTCGTAGATGTGGAAGTGAAA  
GCTACAAGTAGATGTGGAAGTGAAAGCTACAA

---

25. 2/08 - 296 bp

CTAAACCGAGAATCGAAACTAAGCTCTAAACCGAGAATCGAAACTAAGCTGAAGGACTTTC  
AGCGAAGGACTTTCAGCCTTGGGGTTTCCAACCTTGGGGTTTCCAACGTAGATGTGGAAGT  
GAAAGCTACAAGTAGATGTGGAAGTGAAAGCTACAAACGCGTCTAAACCGAGAATCGAAACT  
AAGCTCTAAACCGAGAATCGAAACTAAGCTCAGGGTGGTTCCTTCCAGGGTGGTTCCTTCGT  
AGATGTGGAAGTGAAAGCTACAAGTAGATGTGGAAGTGAAAGCTACAA

---

26. 2/15 - 405 bp

CTAAACCGAGAATCGAAACTAAGCTCTAAACCGAGAATCGAAACTAAGCTATAGGAGGGCTA  
AAGAAAGCAGAAAACCTATAGGAGGGCTAAAGAAAGCAGAACTAAACCGAGAATCGAAACTA  
AGCTCTAAACCGAGAATCGAAACTAAGCTGAAGGACTTTCAGCGAAGGACTTTCAGCCAG  
GGTGGTTCCTTCCAGGGTGGTTCCTTCTCTTGACTCAGTCTCTTGACTCAGTCTAAACCGA  
GAATCGAAACTAAGCTGTGAAGGAGGAAGTCTGAGGCTTGTGAAGGAGGAAGTCTGAGGCAT  
AGGAGGGCTAAAGAAAGCAGAAAACCTATAGGAGGGCTAAAGAAAGCAGAAAGTGAAGGAGGA  
AGTCTGAGGCTTGTGAAGGAGGAAGTCTGAGGC

---

27. 2/14 - 409 bp

CTAAACCGAGAATCGAAACTAAGCTCTAAACCGAGAATCGAAACTAAGCTATAGGAGGGCTA  
AAGAAAGCAGAAAACCTATAGGAGGGCTAAAGAAAGCAGAACTAAACCGAGAATCGAAACTA  
AGCTCTAAACCGAGAATCGAAACTAAGCTGAAGGACTTTCAGCGAAGGACTTTCAGCCTT  
GGGGTTTCCAACCTTGGGGTTTCCAACAGGGTGGTTCCTTCCAGGGTGGTTCCTTCCTAAA  
CCGAGAATCGAAACTAAGCTGTGAAGGAGGAAGTCTGAGGCTTGTGAAGGAGGAAGTCTGAG  
GCATAGGAGGGCTAAAGAAAGCAGAAAACCTATAGGAGGGCTAAAGAAAGCAGAAAGTGAAGG  
AGGAAGTCTGAGGCTTGTGAAGGAGGAAGTCTGAGGC

---

## REFERENCES

- [1] Sun, X. M., Hua, S., Chen, H. R., Ouyang, Z. Y., Einkauf, K., Tse, S., Ard, K., Ciaranello, A., Yawetz, S., Sax, P., Rosenberg, E. S., Lichterfeld, M., and Yu, X. G. (2017) Transcriptional Changes during Naturally Acquired Zika Virus Infection Render Dendritic Cells Highly Conducive to Viral Replication, *Cell Rep.* 21, 3471-3482.
- [2] Hruz, T., Laule, O., Szabo, G., Wessendorp, F., Bleuler, S., Oertle, L., Widmayer, P., Gruissem, W., and Zimmermann, P. (2008) Genevestigator V3: A Reference Expression Database for the Meta-Analysis of Transcriptomes, *Adv. Bioinf.* 2008, 1-5.
- [3] Manh, T. P. V., Alexandre, Y., Baranek, T., Crozat, K., and Dalod, M. (2013) Plasmacytoid, conventional, and monocyte-derived dendritic cells undergo a profound and convergent genetic reprogramming during their maturation, *Eur. J. Immunol.* 43, 1706-1715.
